1           **Dissecting the co-transcriptome landscape of**  
2                           **plants and microbiota members**

3 Tatsuya Nobori<sup>3,4</sup>, Yu Cao<sup>3</sup>, Frederickson Entila<sup>3</sup>, Eik Dahms<sup>3</sup>, Yayoi Tsuda<sup>1,2,3</sup>,  
4 Ruben Garrido-Oter<sup>3,5</sup>, Kenichi Tsuda<sup>1,2,3\*</sup>

5 <sup>1</sup>Key Laboratory of Agricultural Microbiology, College of Plant Science and  
6 Technology, Huazhong Agricultural University, Wuhan 430070, China.

7 <sup>2</sup>The Provincial Key Lab of Plant Pathology of Hubei Province, Huazhong  
8 Agricultural University, Wuhan, China

9 <sup>3</sup>Department of Plant Microbe Interactions, Max Planck Institute for Plant  
10 Breeding Research, Carl-von-Linne-Weg 10, Cologne 50829, Germany.

11 <sup>4</sup>Salk Institute for Biological Studies, La Jolla, CA 92037, USA.

12 <sup>5</sup>Cluster of Excellence on Plant Sciences, 40225 Düsseldorf, Germany.

13 \*Corresponding author. Email: [tsuda@mail.hzau.edu.cn](mailto:tsuda@mail.hzau.edu.cn)

## 14 **Abstract**

15 Interactions between plants and each neighboring microbial species are  
16 fundamental building blocks that collectively determine the structure and function  
17 of the plant microbiota, but the molecular basis of such interactions is poorly  
18 characterized. Here, we monocolonized *Arabidopsis* leaves with nine  
19 plant-associated bacteria from all major phyla of the plant microbiota and profiled  
20 co-transcriptomes of plants and bacteria. These strains elicited quantitatively  
21 different plant transcriptional responses including typical pattern-triggered  
22 immunity responses. Genes of non-pathogenic bacteria involved in general  
23 metabolism and energy production were commonly suppressed *in planta* in  
24 contrast to a virulent pathogen. Various nutrient acquisition pathways that are  
25 frequently encoded in the genomes of plant-associated bacteria were induced *in*  
26 *planta* in a strain-specific manner, shedding light on bacterial adaptation to the  
27 plant environment and identifying a potential driving force of niche separation.  
28 Integrative analyses of plant and bacterial transcriptomes suggested that the  
29 transcriptional reprogramming of plants is largely uncoupled from that of bacteria  
30 at an early stage of interactions. This study provides insights into how plants  
31 discriminate among bacterial strains and sets the foundation for in-depth  
32 mechanistic dissection of plant-microbiota interactions.

### 33 Introduction

34 In nature, plants can reproducibly assemble bacterial communities with  
35 well-defined taxonomic structures (the plant microbiota) (Hacquard et al., 2015),  
36 which can be harnessed for plant health and survival (Carrión et al., 2019; Durán  
37 et al., 2018; Kwak et al., 2018). How plants discriminate among various bacterial  
38 strains and establish strain-specific associations in a community context remains  
39 an open question in basic plant microbiota research and is key to facilitate the  
40 application of microbiota-based strategies to improve plant health in agricultural  
41 settings. Answering this question requires a comprehensive and unified  
42 understanding of plant and bacterial responses during their interactions.

43 Plant responses to microorganisms are controlled by the plant innate immune  
44 system, which contributes to the assembly and maintenance of healthy bacterial  
45 communities (Chen et al., 2020; Lebeis et al., 2015). A crucial part of the plant  
46 immune system is the perception of environmental microbes using cell surface  
47 receptors that detect conserved microbial epitopes, termed microbe-associated  
48 molecular patterns (MAMPs) (Boller and Felix, 2009). Recognition of MAMPs  
49 triggers defense responses collectively called pattern-triggered immunity (PTI),  
50 which can inhibit pathogen growth (Jones and Dangl, 2006). MAMPs such as the  
51 bacterial flagellin peptide flg22 are widely conserved in non-pathogenic bacteria  
52 as well as pathogenic bacteria (Hacquard et al., 2017), and some  
53 non-pathogenic Proteobacteria strains were shown to trigger defense responses  
54 in plant leaves likely via PTI pathways (Vogel et al., 2016). On the other hand,  
55 diverse microbiota members can suppress PTI triggered by flg22 in roots  
56 (Garrido-Oter et al., 2018; Teixeira et al., 2021; Yu et al., 2019), which can  
57 facilitate colonization by the root microbiota (Teixeira et al., 2021; Yu et al., 2019).  
58 Thus, PTI activation by divergent MAMPs and subsequent PTI modulation by  
59 plant-associated bacteria might steer plant responses in a bacterial  
60 strain-specific manner, contributing to microbiota assembly in roots. In leaves,

61 however, our current understanding of plant responses to individual microbiota  
62 members is largely limited to a specific phylum of bacteria, Proteobacteria, and  
63 little is known about how plants respond to bacterial strains belonging to other  
64 major phyla such as Actinobacteria, Bacteroidetes, and Firmicutes.

65 When colonized densely and heterogeneously by various bacterial species,  
66 plants might not be able to tailor their responses to individual bacterial strains.  
67 Yet, it might be possible that different plant-associated bacterial species respond  
68 differently to the same microenvironments created by plants. If so, analyzing  
69 plant responses alone does not wholly explain bacterial responses during  
70 interactions with hosts. The explanation requires directly interrogating bacterial  
71 responses *in planta* at the genome-wide scale. *In planta* bacterial omics  
72 approaches, such as transcriptomics, are powerful in understanding bacterial  
73 gene functions in the plant microbiome and how plants influence bacterial  
74 activities (Levy et al., 2018). To date, however, there is a handful of *in planta*  
75 bacterial transcriptome studies, all focusing on pathogenic Proteobacteria strains  
76 (Chapelle et al., 2015; Lovelace et al., 2018; Nobori et al., 2018, 2020; Yu et al.,  
77 2013, 2014). It is, therefore, unknown whether plant-associated bacteria have  
78 any common or phylum-specific signatures in the usage of their genomes and  
79 what kind of functions are important for their non-pathogenic and sometimes  
80 beneficial traits in plants. Furthermore, to our knowledge, no study has analyzed  
81 plant and bacterial transcriptome responses at the same time, limiting our ability  
82 to build hypotheses about the molecular dialogue between plants and microbiota  
83 members.

84 Here, in monoassociation conditions, we co-profiled the transcriptomes of the  
85 model plant *Arabidopsis thaliana* and various bacterial strains isolated from  
86 healthy (asymptomatic) plants in nature (hereafter commensal strains),  
87 representing all major phyla of the plant microbiota residing in leaves.  
88 Commensal strains commonly induced PTI responses in plants, but these  
89 differed in intensity. We found examples of both common and strain-specific

90 regulation of commensal gene expression in plants. Bacterial genes enriched in  
91 plant-associated strains tended to be induced *in planta*. These included genes  
92 involved in sulfur, nitrogen, and carbon transport and metabolism, which were  
93 induced *in planta* in a strain-specific manner. This suggests that nutrient status  
94 differs for different strains in plants, which may affect bacterial fitness and niche  
95 separation. We also observed that plants could elicit different transcriptional  
96 responses from different bacterial strains without tailoring their own  
97 transcriptional reprogramming. This study provides a framework for dissecting  
98 plant-microbiota interactions at the strain level using co-transcriptomics and  
99 unravels diverse modes of interactions between plants and commensal bacteria.

## 100 **Results**

### 101 **Co-transcriptome analysis of plants and plant microbiota** 102 **members**

103 We developed a pipeline to simultaneously investigate the transcriptomes of both  
104 plants and bacteria during plant colonization with a single bacterial strain. We  
105 monocolonized *A. thaliana* wild-type Col-0 leaves with individual commensal  
106 strains by hand-infiltration and profiled transcriptomes of plants and bacteria at 6  
107 hours post-inoculation (hpi) by RNA-seq (**Fig. 1A**). For *in planta* bacterial  
108 RNA-seq, we used a previously developed method with some modifications (see  
109 Methods). Briefly, bacterial cells are isolated from plant leaves before extracting  
110 RNA, followed by rRNA depletion and RNA-seq (Nobori et al., 2018). For plant  
111 and bacterial RNA-seq, respectively, 18 and nine commensal strains were  
112 selected covering all major phyla of the plant microbiota (**Fig. 1B and Table 1**).  
113 Three biological replicates from independent experiments were taken for each  
114 condition. We used the same strain IDs as in the original study where these  
115 bacterial strains were isolated from wild *A. thaliana* plants (leaves and roots) or

116 soil (Bai et al., 2015). A strain ID indicates the original compartment from which  
117 the strain was isolated, but many root/soil isolates can also colonize the shoot,  
118 indicating extensive niche overlap (Bai et al., 2015).

119 Nine commensal strains were used for co-transcriptome analysis (**Fig. 1C**).  
120 These strains could colonize to various degrees in the leaf endosphere when  
121 inoculated on the leaf surface (**Fig. S1**). For plants, we compared gene  
122 expression changes between bacteria-inoculated plants and water-inoculated  
123 plants (**Fig. 1C, left**). For bacteria, we compared expression changes between *in*  
124 *planta* and *in vitro* (rich media) conditions (**Fig. 1C, right; Fig. S2A**). We also  
125 included previously generated *in planta/in vitro* transcriptome data of the virulent  
126 pathogen *Pseudomonas syringae* pv. *tomato* DC3000 (*Pto*) and its avirulent  
127 mutant D36E (36 type III effectors are depleted) (Nobori et al., 2018) in the  
128 analysis. To directly compare bacterial gene expression patterns among  
129 phylogenetically diverse bacterial strains, genes of different strains were grouped  
130 based on sequence homology, resulting in 6,823 orthologous groups (OGs) (**Fig.**  
131 **S2B**). Of these OGs, only 454 OGs were shared among all strains (**Data S1**),  
132 indicating that the commensal strains used in this study possess highly diverse  
133 gene sets. Principal component analysis using the shared OGs showed that all  
134 commensal strains except for Leaf1, showed relatively similar gene expression  
135 patterns both *in planta* and under *in vitro* conditions (**Fig. 1D**). Interestingly, while  
136 the gene expression pattern of the avirulent pathogen D36E *in planta* was similar  
137 to those of commensals, the virulent *Pto* showed a distinct pattern, i.e., *Pto in*  
138 *planta* resembled commensals *in vitro* (**Fig. 1D**). Thus, the commensal strains  
139 used in this study have highly different genomes, but *in planta* expression of  
140 shared genes is similar to each other and highly distinct from that of a virulent  
141 pathogen.

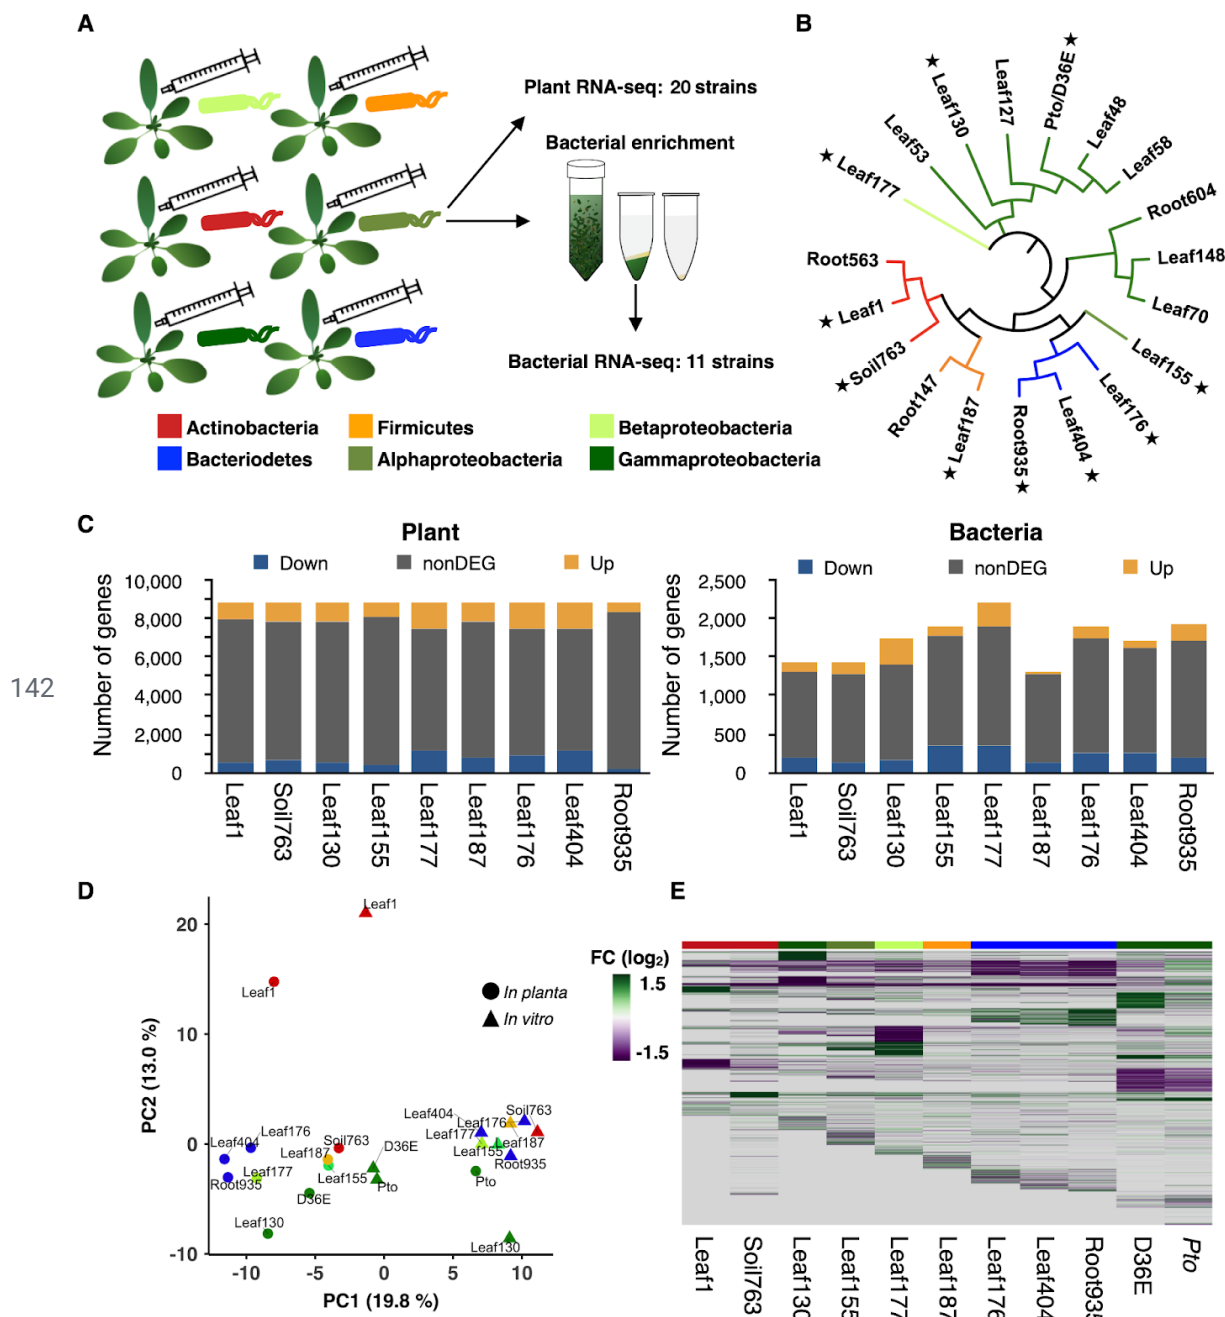

143 **Fig. 1: Co-transcriptomics of plants and bacteria** (A) Experimental scheme.  
 144 Individual bacterial strains were syringe-infiltrated into leaves of *A. thaliana*.  
 145 Leaves were sampled at 6 h post-inoculation. Total RNA was extracted for plant  
 146 RNA-seq. For bacterial RNA-seq, bacterial cells were isolated from plant leaves  
 147 before extracting RNA using a method previously reported (Nobori et al., 2018).  
 148 (B) Bacterial strains used in this study. Stars indicate the strains used for  
 149 co-transcriptome analysis. Detailed taxonomic information is shown in Table 1.  
 150 (C) The number of genes differentially regulated ( $|\log_2FC| > 1$ ; FDR < 0.01;  
 151 two-tailed Student's t test followed by Storey's q-value) in plant or bacterial

152 RNA-seq. Plant: bacteria-inoculated vs. water-inoculated. Bacteria: *in planta* 6 h  
 153 vs. *in vitro* (rich media). Bacterial strains used for co-transcriptomics are shown.  
 154 **(D)** Principal component analysis of bacterial gene (orthologous group)  
 155 expression *in planta* and *in vitro*. **(E)** Gene expression fold changes (*in planta* vs.  
 156 *in vitro*) of bacteria. The data of *Pto* and D36E are from a previous study (Nobori  
 157 et al., 2018). Genes not detected or missing in the genome are shown in gray.  
 158 See **Data S2** for gene expression data. **(A, B, D, and E)** The taxonomic affiliation  
 159 (phylum/class level) of each strain is indicated with different colors.

| ID         | Phylum         | Class               | Order              | Family              | Genus            | RNA-seq |
|------------|----------------|---------------------|--------------------|---------------------|------------------|---------|
| Leaf1      | Actinobacteria | Actinobacteria      | Actinomycetales    | Microbacteriaceae   | Microbacterium   | P, B    |
| Root563    | Actinobacteria | Actinobacteria      | Actinomycetales    | Intrasporangiaceae  | Janibacter       | P       |
| Soil763    | Actinobacteria | Actinobacteria      | Actinomycetales    | Micrococcaceae      | Arthrobacter     | P, B    |
| Leaf176    | Bacteroidetes  | Sphingobacteriia    | Sphingobacteriales | Sphingobacteriaceae | Pedobacter       | P, B    |
| Leaf404    | Bacteroidetes  | Flavobacteriia      | Flavobacteriales   | Flavobacteriaceae   | Chryseobacterium | P, B    |
| Root935    | Bacteroidetes  | Flavobacteriia      | Flavobacteriales   | Flavobacteriaceae   | Flavobacterium   | P, B    |
| Leaf187    | Firmicutes     | Bacilli             | Bacillales         | Exiguobacterium     | Exiguobacterium  | P, B    |
| Root147    | Firmicutes     | Bacilli             | Bacillales         | Bacillaceae         |                  | P       |
| Leaf155    | Proteobacteria | Alphaproteobacteria | Rhizobiales        | Rhizobiaceae        | Agrobacterium    | P, B    |
| Leaf177    | Proteobacteria | Betaproteobacteria  | Burkholderiales    | Burkholderiaceae    | Burkholderia     | P, B    |
| Leaf53     | Proteobacteria | Gammaproteobacteria | Enterobacteriales  | Enterobacteriaceae  | Erwinia          | P       |
| Leaf70     | Proteobacteria | Gammaproteobacteria | Xanthomonadales    | Xanthomonadaceae    | Xanthomonas      | P       |
| Leaf148    | Proteobacteria | Gammaproteobacteria | Xanthomonadales    | Xanthomonadaceae    | Xanthomonas      | P       |
| Root604    | Proteobacteria | Gammaproteobacteria | Xanthomonadales    | Xanthomonadaceae    |                  | P       |
| Leaf48     | Proteobacteria | Gammaproteobacteria | Pseudomonadales    | Pseudomonadaceae    | Pseudomonas      | P       |
| Leaf58     | Proteobacteria | Gammaproteobacteria | Pseudomonadales    | Pseudomonadaceae    | Pseudomonas      | P       |
| Leaf127    | Proteobacteria | Gammaproteobacteria | Pseudomonadales    | Pseudomonadaceae    | Pseudomonas      | P       |
| Leaf130    | Proteobacteria | Gammaproteobacteria | Pseudomonadales    | Moraxellaceae       | Acinetobacter    | P, B    |
| <i>Pto</i> | Proteobacteria | Gammaproteobacteria | Pseudomonadales    | Pseudomonadaceae    | Pseudomonas      | P, B    |
| D36E       | Proteobacteria | Gammaproteobacteria | Pseudomonadales    | Pseudomonadaceae    | Pseudomonas      | P, B    |

160 **Table 1: List of bacterial strains used in this study** RNA-seq data (P, plant; B,  
 161 bacteria) obtained in this study are indicated.

## 162 **Conserved and strain-specific regulation of commensal** 163 **functions *in planta***

164 The high variability in bacterial genomes complicates a genome-wide comparison  
 165 of bacterial gene expression among phylogenetically diverse strains (**Fig. 1E**). To  
 166 overcome this problem, we sought to compare the regulation of bacterial  
 167 functions rather than of individual genes. For each strain, we performed



168 functional enrichment analysis on genes significantly up- or down-regulated *in*  
169 *planta* using KEGG ontologies (KOs) assigned to individual OGs (see Method for  
170 details). Then, enrichment scores ( $p$  values) for individual KOs were summarized  
171 for all the strains (**Fig. 2A and Fig. S3A**). Data from *Pto* grown in a minimal  
172 medium were included to determine the effect of nutrient availability on gene  
173 expression changes in a pathogen. A clear pattern distinguishing virulent and  
174 avirulent strains was seen in the process “ribosome” (**Fig. 2A and 2B**). Genes  
175 encoding ribosomal subunits were significantly suppressed *in planta* in all the  
176 commensal strains tested and the avirulent pathogen D36E, while these genes  
177 were induced in the virulent pathogen *Pto* (**Fig. 2A and 2B**). The population  
178 density of *Pto* remains unchanged at this time point (Nobori et al., 2018),  
179 indicating that the gene expression changes are not the consequence of  
180 bacterial growth *in planta*. This process was also suppressed in *Pto* grown in a  
181 minimal medium compared with a rich medium (**Fig. 2A and 2B**). Similarly,  
182 genes encoding proton ATPases, which are involved in energy production, were  
183 induced in *Pto in planta*, but suppressed or not altered in the commensal strains  
184 (**Fig. 2A and 2B**). Together, these results suggest that commensal strains are  
185 metabolically less active *in planta* compared with a virulent pathogen, which is  
186 consistent with the notion that commensal strains do not proliferate in plants to  
187 the same extent as virulent pathogens. Since D36E is a mutant of *Pto* lacking  
188 PTI-suppressing effector molecules, PTI is likely responsible for suppressing  
189 bacterial metabolism *in planta*, at least in this strain. Catalase genes were  
190 commonly induced in most commensals and D36E at varying degrees but not in  
191 *Pto* (**Fig. 2C**), suggesting that commensals are responding to plant ROS burst, a  
192 characteristic PTI response.

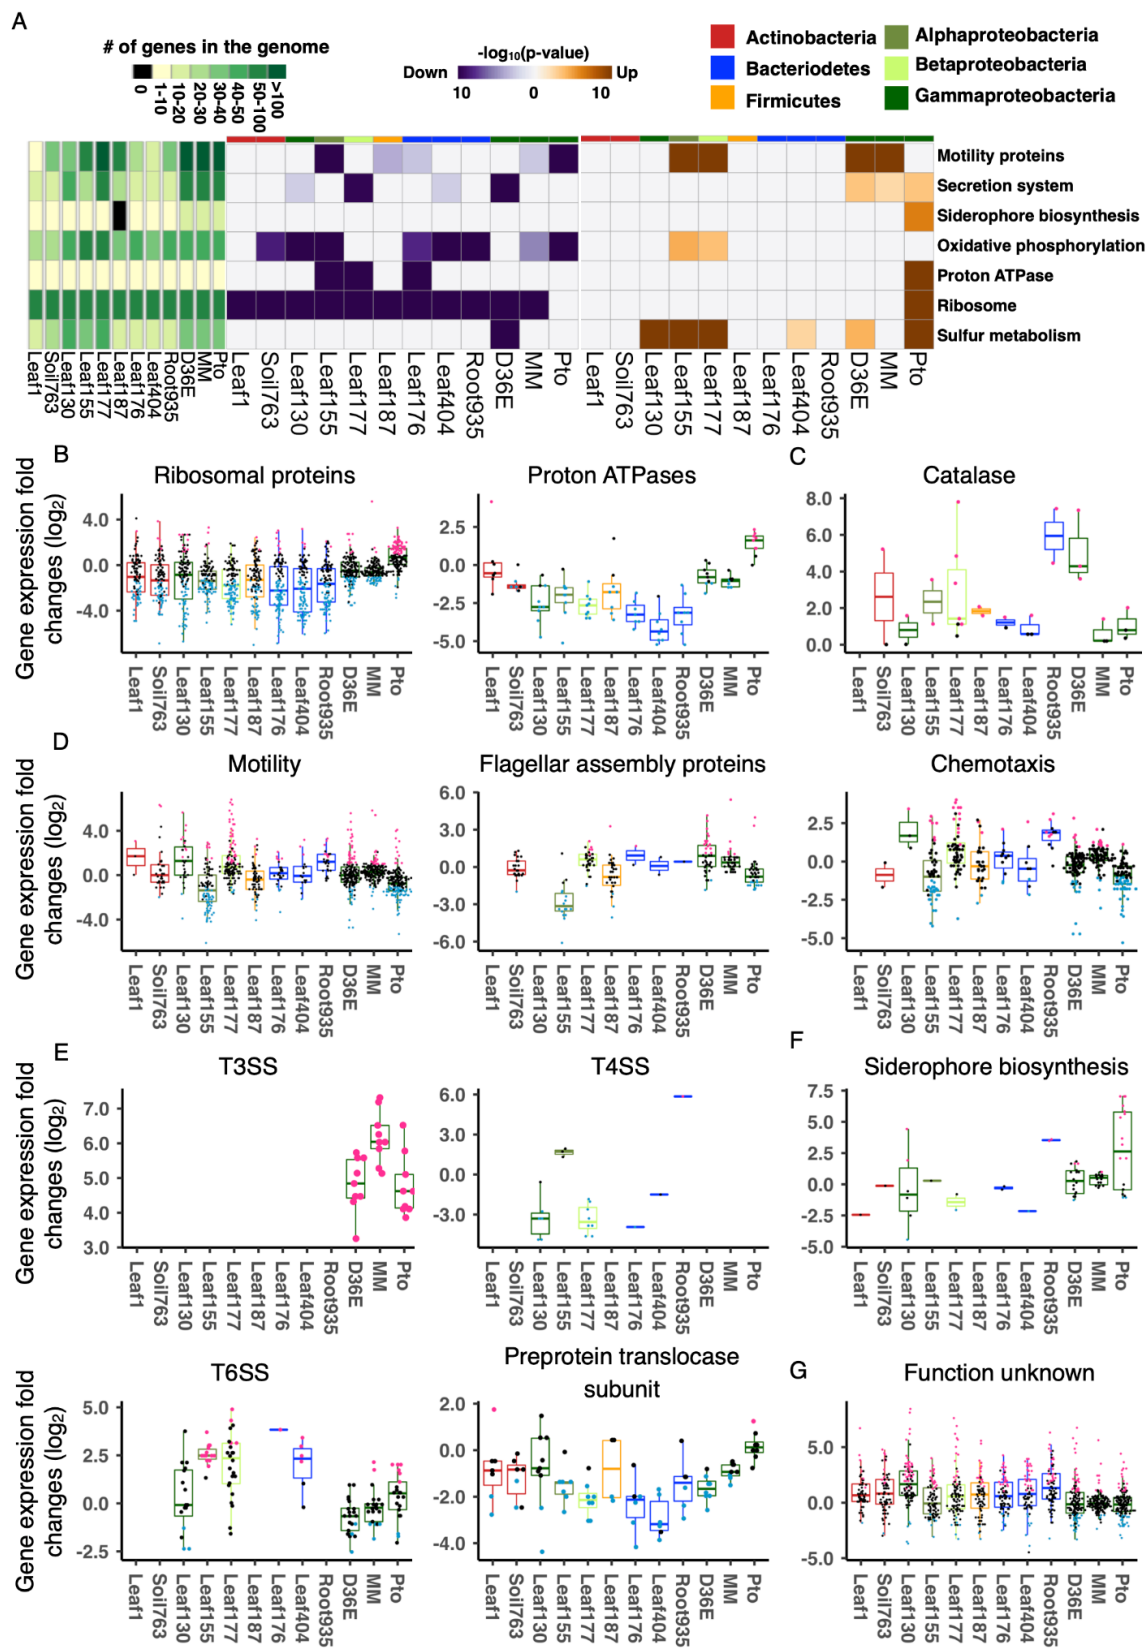

193 **Fig. 2: Conserved and strain-specific regulation of bacterial functions in**  
194 **plants (A)** KEGG ontology (KO) terms enriched in genes that are significantly  
195 up- (orange) or down (purple)-regulated *in planta* compared with *in vitro* (rich  
196 media). The heatmaps indicate  $-\log_{10}$  p-value (FDR corrected by  
197 Benjamini–Hochberg method). A KO can be both significantly up and  
198 down-regulated in the same strain. The left green panel shows the number of  
199 genes involved in each KO term. The top color bars indicate the taxonomic  
200 affiliation (phylum/class level) of each strain. See **Fig. S2** for a more  
201 comprehensive list of KOs. **(B–G)** Expression fold changes (*in planta* vs. *in vitro*)  
202 of genes involved in **(B)** general metabolism, **(C)** catalase metabolic pathway, **(D)**  
203 motility, **(E)** secretion systems, **(F)** siderophore biosynthesis, and **(G)** unknown  
204 functions. T3SS, type III secretion system. T4SS, type IV secretion system.  
205 T6SS, type VI secretion system. MM, *Pto* grown in a minimal medium. Results  
206 are shown as box plots with boxes displaying the 25th–75th percentiles, the  
207 centerline indicating the median, whiskers extending to the minimum, and  
208 maximum values no further than 1.5 inter-quartile range. All individual data points  
209 (genes) are overlaid with colors for DEGs (red: upregulated, blue:  
210 downregulated, black: non-DEG).

211 Genes involved in bacterial motility were differentially regulated among  
212 bacteria in plants. Many of these genes were suppressed in *Pto in planta* but  
213 induced in D36E (**Fig. 2A and 2D**). Leaf177, a *Burkholderia* (Betaproteobacteria)  
214 strain, showed a similar pattern to D36E (**Fig. 2A and 2D**). However, the  
215 *Rhizobia* (Alphaproteobacteria) Leaf155 more closely resembled virulent *Pto* – a  
216 majority of the genes were suppressed *in planta*, whereas some genes were  
217 significantly induced (**Fig. 2D**). Motility-related genes can be classed into two  
218 major functional categories, flagellar assembly, and chemotaxis. Genes encoding  
219 flagellar assembly proteins were globally suppressed *in planta* in Leaf155 as in  
220 *Pto*, and many Leaf177 chemotaxis-related genes were induced *in planta* in  
221 contrast to *Pto* (**Fig. 2D**). Thus, physiological processes are differentially  
222 regulated among different plant-associated commensal bacteria strains, with  
223 some species even exhibiting similarity to a virulent pathogen.

224 The type III secretion system, an essential component of the virulence of  
225 bacterial pathogens, including *Pto* (Toruño et al., 2016), was strongly induced in  
226 *Pto* and D36E, but these genes were absent in the commensals (**Fig. 2E**). The

227 type IV secretion system is involved in multiple processes such as translocating  
228 proteins and DNA into other cells and bacterial motility (Costa et al., 2015). This  
229 process was globally suppressed in Leaf130 and Leaf177, but not in Leaf155  
230 (Fig. 2E). The type VI secretion system is an injection machine involved in  
231 bacteria-host and bacteria-bacteria interactions (Russell et al., 2014). This  
232 machinery was globally induced in Leaf155 and Leaf404 and partially induced in  
233 Leaf177 and *Pto* (Fig. 2E). Lastly, preprotein translocase subunits, which are  
234 involved in the bacterial general secretory pathway (Osborne et al., 2005),  
235 tended to be suppressed in all commensals and D36E, but not in *Pto* (Fig. 2E).

236 It has been shown that genes encoding iron-chelating siderophores are  
237 strongly induced in *Pto* upon plant infection, and the induction of these genes is  
238 blocked by plant immunity to suppress bacterial growth (Nobori et al., 2018) (Fig.  
239 2F). Commensal strains either harbor only a few or completely lack genes  
240 encoding siderophores, and most of these genes were not induced *in planta* (Fig.  
241 2F). We speculate that siderophores are not actively used by commensals in  
242 leaves and/or that plant immunity suppresses the production of siderophores to  
243 control commensal growth. Notably, many genes annotated as “Function  
244 unknown” were significantly induced *in planta* in various commensals (Fig. 2G).  
245 These functionally unannotated genes induced *in planta* may have unique roles  
246 in plant-bacterial interactions.

## 247 **Phylum and strain-specific gene expression**

248 To compare expression of individual genes between different strains, we  
249 conducted comparative transcriptome analysis focusing on specific phyla (Fig.  
250 S4A and S4C). This approach allows more comprehensive comparative  
251 transcriptome analysis as more genes are shared among closely related strains.  
252 We focused on Bacteroidetes and Proteobacteria, in which 1,422 and 1,122 OGs  
253 were shared, respectively (far more than the 454 OGs shared among the nine

254 commensals) (Fig. S2B, S4A, and S4C). Overall, many genes were differentially  
255 regulated in a single strain (Fig. S2B, S4A, and S4C). In both of these phyla, a  
256 larger number of genes were commonly suppressed among the three strains in  
257 plants than commonly induced (Fig. S4B, S4D, and S5). Clusters of genes  
258 commonly suppressed *in planta* (clusters 7 & 8 in Bacteroidetes and clusters 1 &  
259 4 in Proteobacteria) were enriched with “ribosome”-related genes (Fig. S4E).  
260 “Transporters” were enriched in multiple clusters with various expression patterns  
261 (Fig. S4F and S6A), suggesting that transporters can be separated into  
262 sub-groups based on regulation in plants. Also, genes annotated as part of a  
263 “two-component system” showed strain-specific expression patterns (Fig. S4G  
264 and S6B). Taken together, our intraphylum analysis reveals that even relatively  
265 closely related commensal strains respond differently *in planta* at the  
266 transcriptional level.

## 267 ***In planta* bacterial transcriptomics illuminates bacterial** 268 **adaptation to the leaf environment**

269 Various bacterial functions were differentially regulated in plants in a  
270 strain-specific manner. Is such functional regulation relevant for bacterial fitness  
271 in plants? Comparative genomics is one way to infer bacterial functions  
272 associated with adaptation to the plant environment. A previous study compared  
273 the genomes of nearly 4,000 plant-associated and non-plant-associated bacterial  
274 strains and defined “plant-associated (PA) genes” that are significantly enriched  
275 in plant-associated strains (Levy et al., 2017). We analyzed how PA genes are  
276 regulated in plants in our transcriptome data. When analyzing the genes shared  
277 among nine commensal strains, we observed that genes induced *in planta*  
278 tended to be enriched with PA genes, whereas genes suppressed *in planta*  
279 tended to be enriched with nonPA genes (Fig. 3A). Remarkably, PA and nonPA  
280 genes were significantly enriched with plant-induced and plant-suppressed

281 genes, respectively, for all the commensals, except for the *Firmicutes* strain  
 282 Leaf187 (Fig. 3B). Therefore, our data suggest that bacterial genes associated  
 283 with adaptation to the plant environment were indeed activated *in planta*.

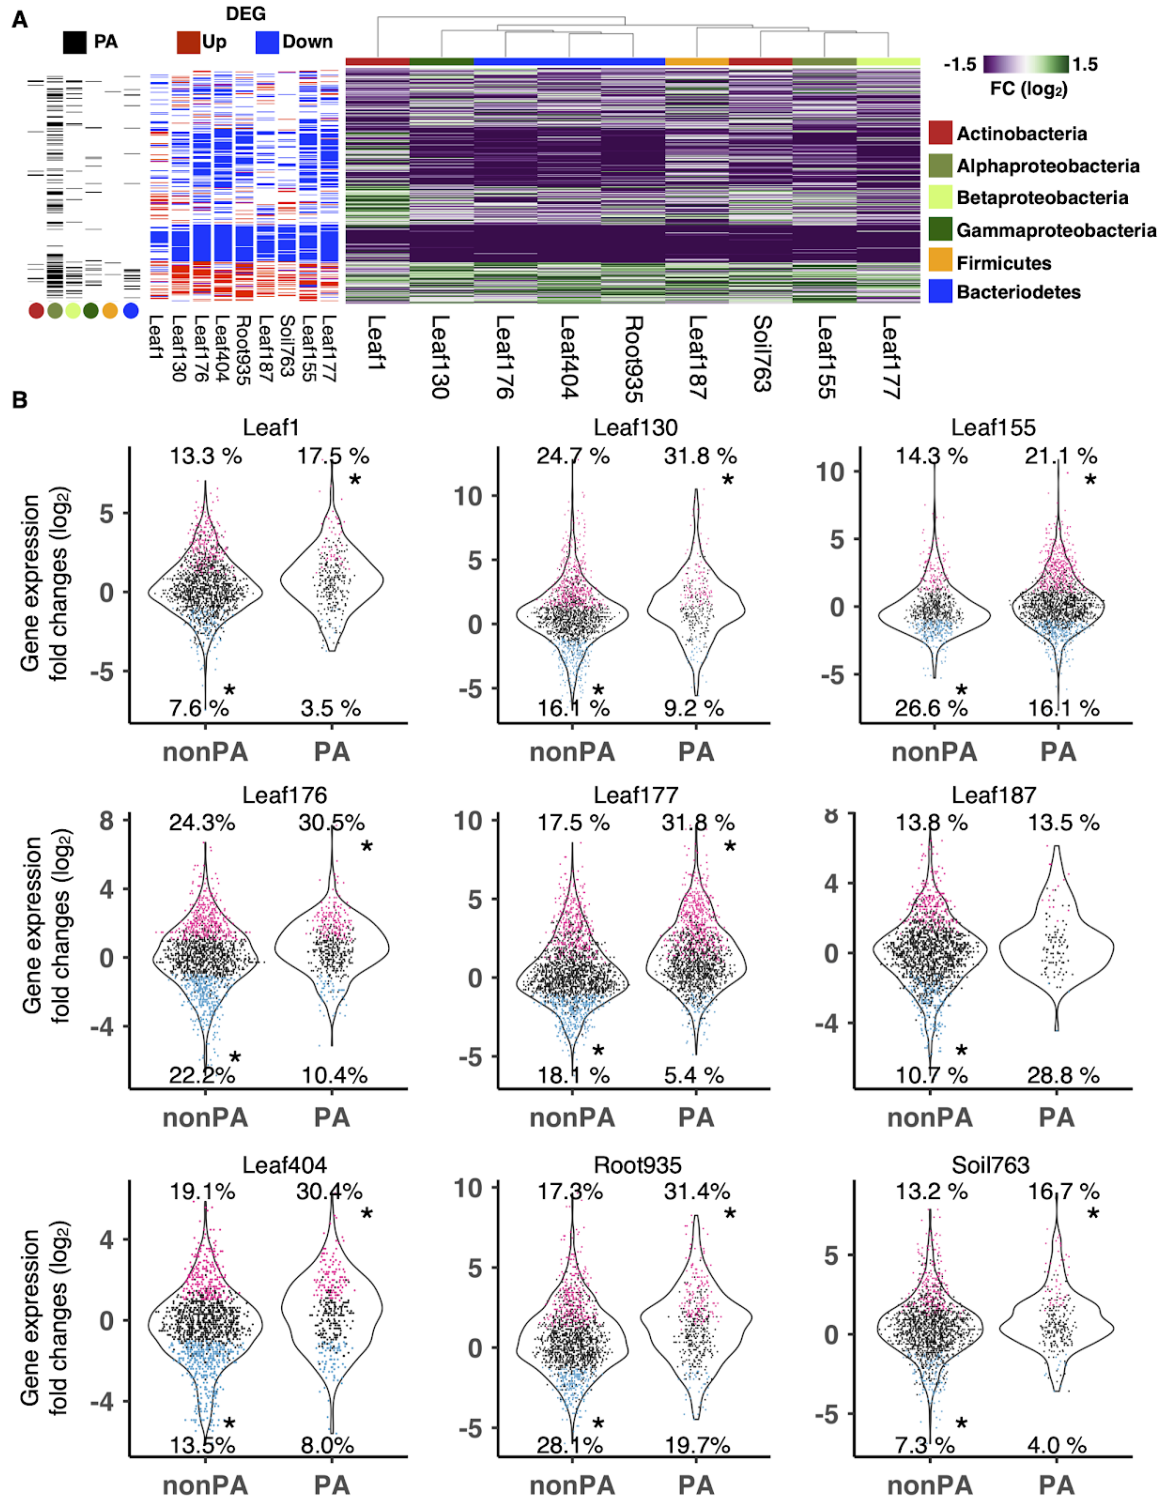

284 **Fig. 3: Genes enriched in plant-associated bacteria are induced *in planta***  
285 **(A)** (Right panel) Bacterial gene expression fold changes (FC) in plants  
286 compared with *in vitro* (rich media). (Middle panel) Genes differentially expressed  
287 *in planta* compared with *in vitro* ( $|\log_2\text{FC}| > 1$ ; FDR < 0.01; two-tailed Student's t  
288 test followed by Storey's q-value). (Left panel) Genes previously shown to be  
289 "plant-associated" (Levy et al., 2017) are shown as black. The bar and dots  
290 indicate the taxonomic affiliation (phylum/class level) of each strain. **(B)** Boxplots  
291 showing expression changes of plant-associated (PA) and non-plant-associated  
292 (nonPA) genes between *in planta* and *in vitro*. Each dot represents a gene.  
293 Genes significantly up- or downregulated *in planta* are colored in red and blue,  
294 respectively. Asterisks indicate statistically significant enrichment (FDR < 0.05;  
295 Hypergeometric test corrected by Benjamini-Hochberg method) of up or  
296 down-regulated genes in the PA or nonPA category. The proportion of genes up-  
297 or downregulated are shown. For the full expression data with the orthologous  
298 group, KEGG annotation, DEG, and PA information, see **Data S3**.

299 We then performed KO enrichment analysis for PA genes induced in plants  
300 and nonPA genes suppressed in plants. Ribosome-related genes were  
301 conserved among all strains (and are thus nonPA genes) and were generally  
302 suppressed in plants (**Fig. 4A**), which may be a strategy by which plants control  
303 bacterial growth. Glycan degradation genes were highly plant-associated and  
304 induced in Bacteroidetes strains Leaf176 and Root935 (**Fig. 4A and 4B**). Among  
305 such genes were homologs of beta-galactosidase, alpha-L-fucosidase, and  
306 glucosylceramidase, which can degrade plant cell wall components. Thus,  
307 Leaf176 and Root935 may have evolved the ability to degrade the plant cell wall  
308 enabling the establishment of favorable niches during plant colonization.

309 "Sulfur metabolism"-related genes were classified as PA genes and were  
310 induced *in planta* in the three *Proteobacteria* strains (**Fig. 4A and 4C**). "ABC  
311 transporters" was another PA function that was induced in *Proteobacteria* strains  
312 *in planta* (**Fig. 4A and 4C**). Genes involved in both categories were sulfur uptake  
313 transporters (**Fig. 4C**). A previous proteomics study showed that the expression  
314 of proteins involved in sulfur metabolism and uptake was induced on the leaf  
315 surface in two commensal *Proteobacteria*, *Sphingomonas melonis* and

316 *Methylobacterium extorquens* (Müller et al., 2016). These results suggest that  
317 sulfate acquisition is important for the adaptation of commensal Proteobacteria to  
318 the plant environment. On the other hand, sulfur metabolism-related genes were  
319 not found to be PA genes and were suppressed *in planta* in the Bacteroidetes  
320 strains Leaf176 and Leaf404 (Fig. 4A and 4C). The number of genes predicted  
321 to be involved in sulfur metabolism was lower in Bacteroidetes strains than in  
322 Proteobacteria strains (Fig. 4A). This may indicate that Bacteroidetes strains are  
323 less reliant on sulfur acquisition during plant colonization.

324 Urea transporters are other ABC transporters that are PA genes and were  
325 induced specifically in some Proteobacteria strains *in planta* (Fig. 4D). Also,  
326 genes encoding ureases, which hydrolyze urea in the bacterial cytoplasm, were  
327 induced in some Proteobacteria strains (Fig. 4D). It has been shown that  
328 *Yersinia enterocolitica*, a Gammaproteobacteria strain, can use urea as a  
329 nitrogen source (Young et al., 1996). These results suggest that Proteobacteria  
330 (especially Leaf177 and D36E) might require urea as a nitrogen source in the  
331 plant apoplast. Also, genes involved in the nitrate transport system were induced  
332 in Leaf130, Leaf155, and D36E *in planta*, but not in *Pto* (Fig. S7), suggesting that  
333 some commensal Proteobacteria strains activate nitrogen acquisition systems in  
334 plants. Similarly, ribose transporters and glycerol transporters are PA genes and  
335 were commonly induced *in planta* in commensal or avirulent Proteobacteria  
336 strains (Leaf155, Leaf177, and D36E) but not in the virulent *Pto* (Fig. 4F).  
337 Moreover, arabinose and xylose transporters (both monosaccharide transporters)  
338 were induced in Leaf177 and D36E *in planta*, but not in *Pto* (Fig. S7). Thus,  
339 these Proteobacteria strains may use various types of sugars as carbon sources  
340 in plants. The induction of urea and sugar acquisition systems may indicate that  
341 commensal bacteria activate nutrient starvation responses in the leaf apoplast.  
342 We speculate that plants may sequester nitrogen and carbon sources from the  
343 apoplast to limit the growth of commensal and avirulent pathogenic bacteria. In  
344 line with this hypothesis, the high-affinity plant urea transporter *AtDUR3* was



345 induced upon inoculation with many commensal strains while suppressed by the  
346 virulent *Pto* (Fig. 4E). A previous study showed that plants sequester  
347 extracellular sugars by activating the sugar influx transporter *AtSTP13* via the  
348 PTI pathway (Yamada et al., 2016). Indeed, our plant transcriptome data showed  
349 that *AtSTP13* is induced by the commensals as well as D36E and *Pto* (Fig. 4G).  
350 On the other hand, *Pto* can induce plant sugar efflux transporters (Chen et al.,  
351 2010), which might increase sugar availability in the apoplast and explain why  
352 *Pto* did not activate its sugar transporters in plants. A non-mutually exclusive  
353 possibility is that the virulent *Pto* switches its metabolic preference to other  
354 substrates during successful infection in plants. In summary, we revealed  
355 bacterial phylum/strain-specific gene repertoires and gene regulation, which may  
356 be actively controlled by plants and drive bacterial niche separation *in planta*.

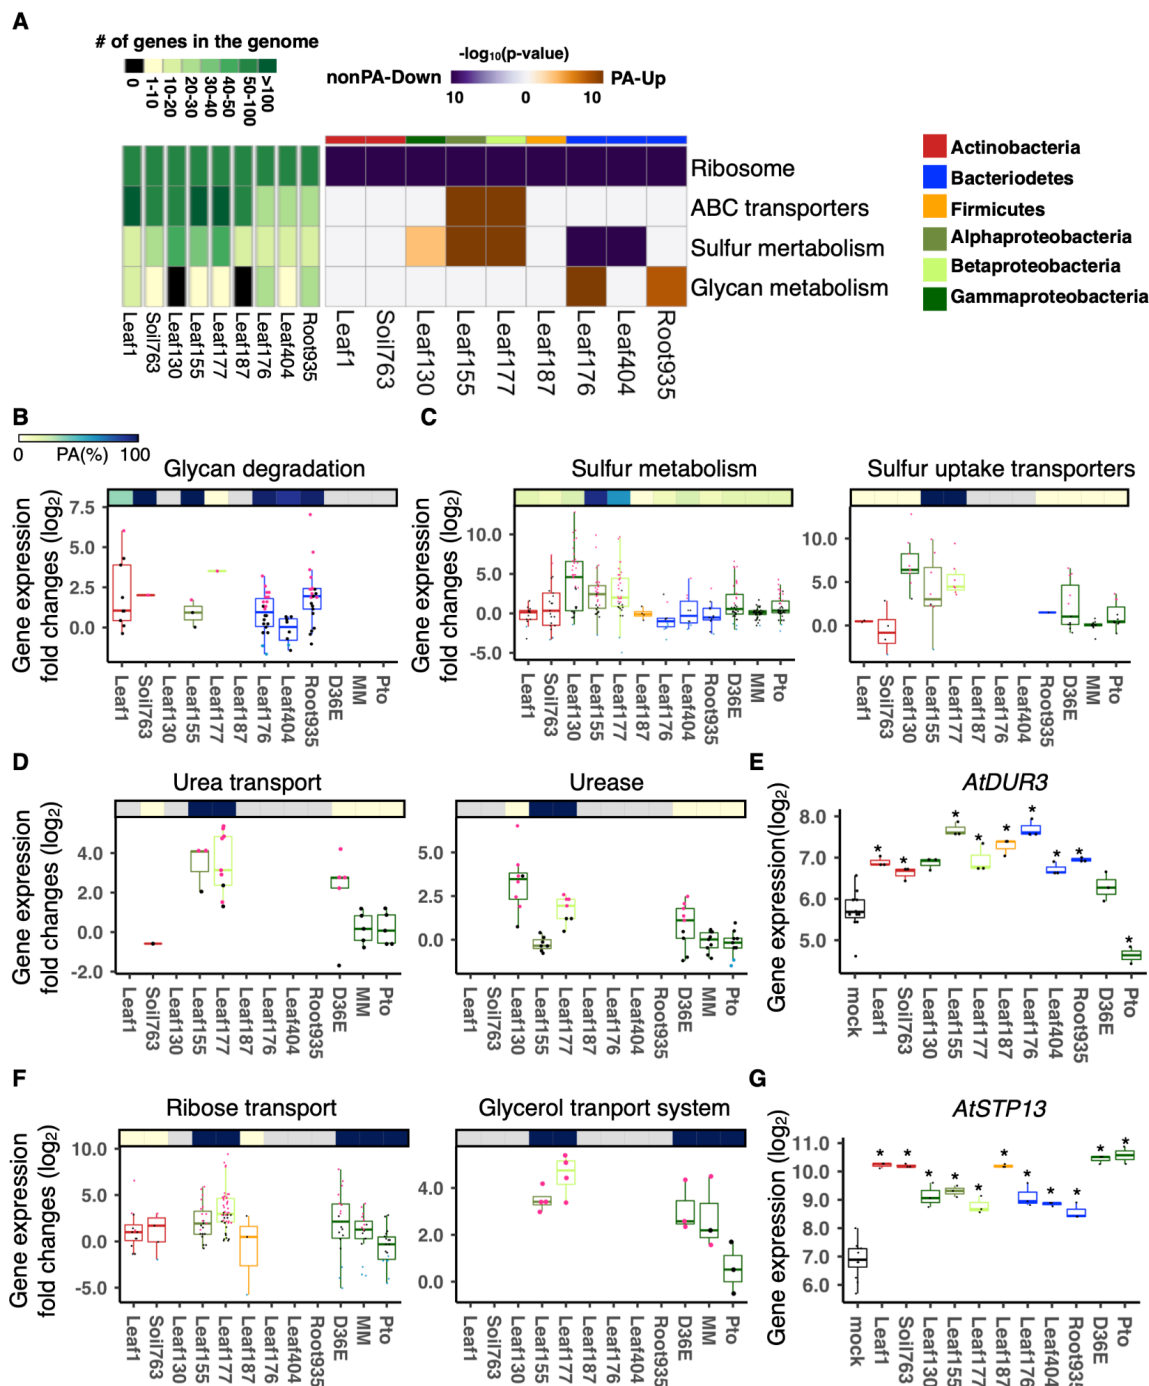

357

358 **Fig. 4: Nutrient acquisition systems are associated with bacterial**  
 359 **adaptation to the plant environment in a strain-specific manner (A)** KEGG  
 360 enrichment analysis of genes that are plant-associated (PA) and significantly  
 361 induced *in planta* compared with *in vitro* (rich media) (orange) and genes that are  
 362 nonPA and significantly suppressed *in planta* compared with *in vitro* (purple). The  
 363 left panel shows the number of genes involved in each KEGG term. **(B-D, F)**  
 364 Expression fold changes (*in planta* vs. *in vitro*) of genes with different functions.

365 The top bars indicate the ratio of PA genes in each strain. All individual data  
366 points (genes) are overlaid to the box plots with colors for DEGs (red:  
367 upregulated, blue: downregulated, black: non-DEG). **(E and G)** Expression of the  
368 plant gene **(E)** *AtDUR3* (urea transporter) and **(G)** *AtSTP13* (sugar transporter)  
369 based on the RNA-seq data. Asterisks indicate statistically significant difference  
370 ( $|\log_2FC| > 1$ ; FDR < 0.01; two-tailed Student's t test followed by Storey's  
371 q-value) compared with the mock (water-inoculated) condition. In the box plots,  
372 boxes display the 25th–75th percentiles, the centerline indicating the median,  
373 whiskers extending to the minimum, and maximum values no further than 1.5  
374 inter-quartile range. For the full expression data with the orthologous group,  
375 KEGG annotation, DEG, and PA information, see **Data S3**.

### 376 **Commensals activate plant PTI in a strain-specific manner**

377 As commensal strains showed differing responses in plants, indicating strain  
378 specificity in the interactions of plants with bacteria, we investigated  
379 genome-wide plant responses to individual commensals by RNA-seq. In addition  
380 to the nine strains used for the bacterial transcriptome analysis, we added nine  
381 more commensal strains to enrich our dataset. Global gene expression changes  
382 (bacteria-inoculated vs. water-inoculated) were similar among all commensal  
383 strains as well as D36E at 6 hpi (**Fig. 5A**). Interestingly, plant gene expression  
384 changes triggered by commensals overlapped markedly with responses to flg22  
385 (Hillmer et al., 2017), a potent PTI inducer. PTI-inducible genes accounted for  
386 clusters of genes commonly and strongly induced by most of the commensals  
387 (clusters 3 & 5 in **Fig. 5A**). GO enrichment analysis showed that these clusters  
388 are enriched with genes related to defense responses (**Fig. 5B**). Thus,  
389 commensal strains, when infiltrated into plant leaves, can induce MTI.

390 The degree of PTI induction varied among strains in a manner that is partly  
391 determined by phylogeny: Gammaproteobacteria and Actinobacteria strains  
392 induced stronger PTI than Bacteroidetes strains (**Fig. 5C**). We then investigated  
393 the amino acid sequences of the major MAMPs flg22 and elf18 across the  
394 different strains. Intriguingly, strains with flg22 and elf18 sequences similar to  
395 those known to be particularly potent PTI inducers (Felix et al., 1999; Kunze et  
396 al., 2004) tended to elicit strong PTI induction (gene expression fold changes in

397 clusters 3 or 5) (Fig. 5D). Thus, sequence variation in these MAMPs may partly  
 398 determine the degree of PTI induced by some of these commensal strains.

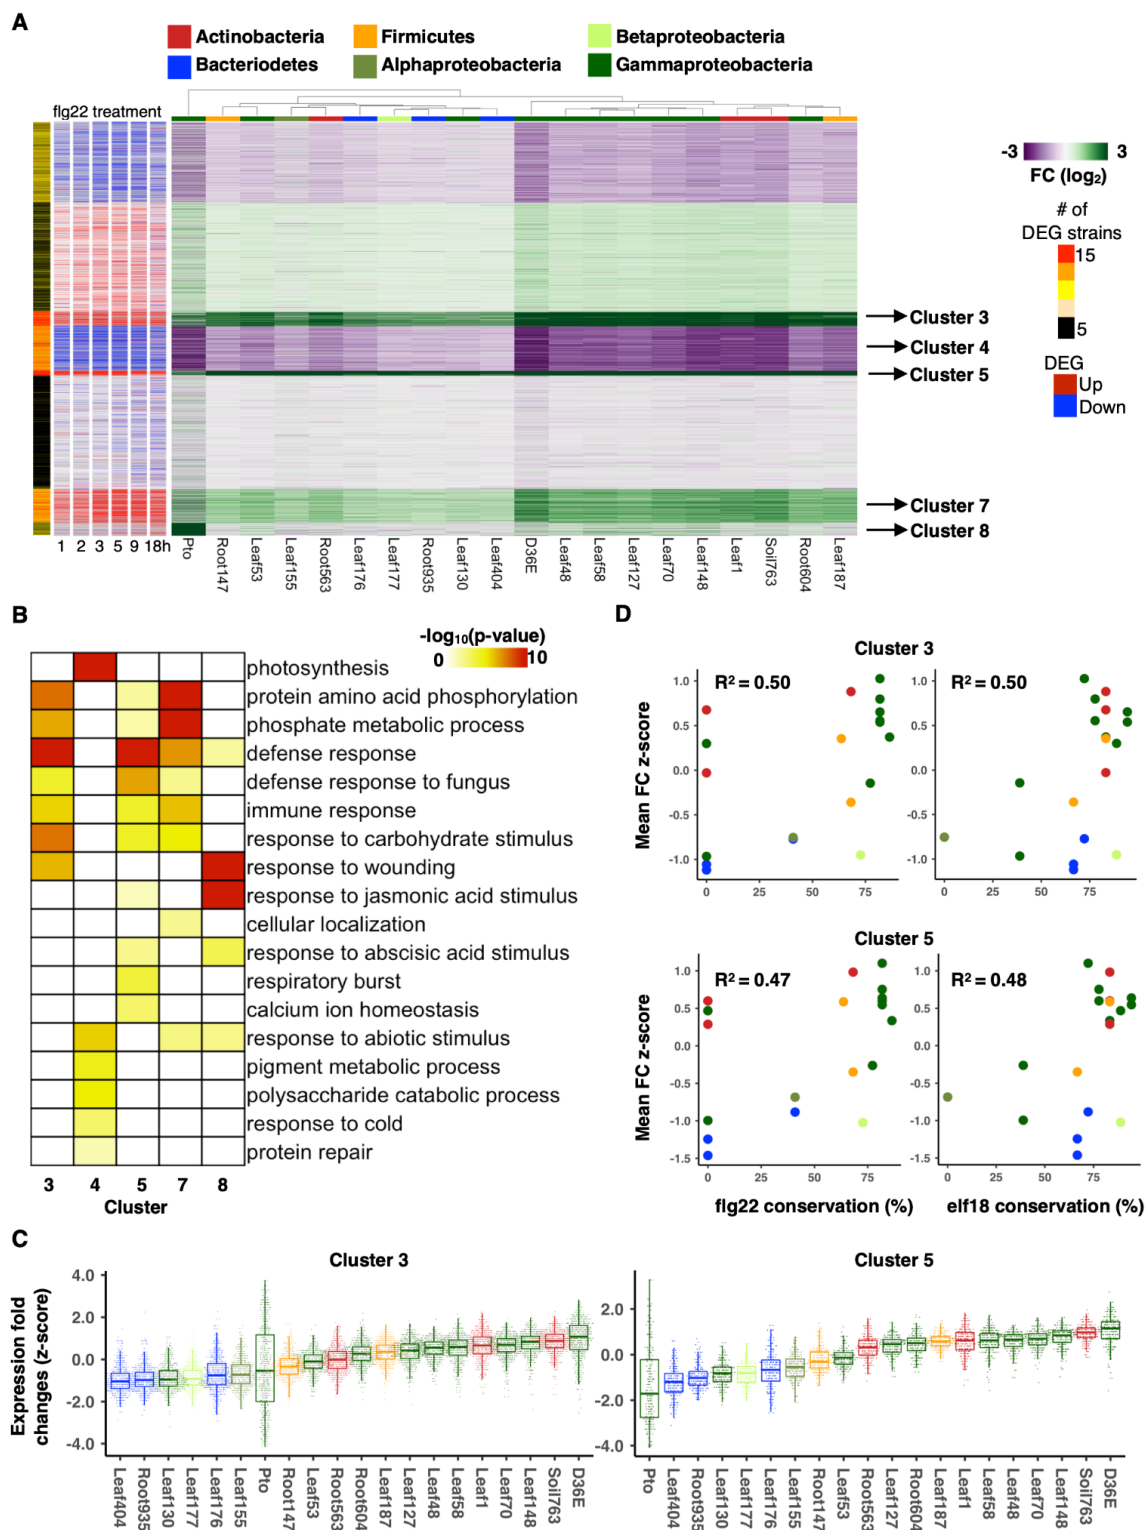

399 **Fig. 5: Plant transcriptome responses to phylogenetically diverse**  
400 **commensals (A)** (Green/purple heatmap) Gene expression fold changes (FCs)  
401 between bacteria-inoculated plants and water-inoculated plants. (Red/blue  
402 heatmap) Plant genes significantly induced or suppressed upon flg22 treatment  
403 at different time points (Hillmer et al., 2017). The number of strains causing  
404 differential gene expression ( $|\log_2\text{FC}| > 1$ ; FDR < 0.01; two-tailed Student's t test  
405 followed by Storey's q-value) are indicated in the sidebar (# of DEG strains).  
406 DEG, differentially expressed gene. Genes were clustered by k-mean clustering  
407 ( $k = 8$ ). The bars on the heatmaps indicate the taxonomic affiliation (phylum/class  
408 level) of each strain. See **Data S4** for gene expression data. **(B)** Gene ontology  
409 enrichment analysis for genes in clusters 3, 4, 5, 7, and 8 of **(A)**.  $-\log_{10}$  p-values  
410 (FDR corrected by Benjamini-Hochberg method) were shown. **(C)** Expression  
411 fold changes (FC; z-score) of genes in clusters 3 and 5. Results are shown as  
412 box plots with boxes displaying the 25th–75th percentiles, the centerline  
413 indicating the median, whiskers extending to the minimum, and maximum values  
414 no further than 1.5 inter-quartile range. **(D)** Relationships between amino acid  
415 (AA) sequence conservation of flg22 or elf18 and normalized expression FCs of  
416 genes in clusters 3 and 5. AA sequence conservation of flg22 and elf18  
417 compared with the canonical sequences known to induce strong defense  
418 responses in plants (Elf18: SKEKFERTKPHVNVGTIG. Flg22:  
419 QRLSTGSRINSAKDDAAGLQIA). The Pearson correlation coefficients are  
420 shown. **(C-D)** The same color code was used for the taxonomic affiliation.

#### 421 **Plant responses do not correlate with bacterial responses in plants**

422 Principal component analysis showed that plant and bacterial transcriptome  
423 patterns were incongruent with each other (**Fig. 6A**). For instance, we observed  
424 similarity between the plant transcriptome changes elicited by different  
425 Actinobacteria strains (Leaf1 and Soil763), but the strains themselves respond  
426 highly differently *in planta* (**Fig. 6A**). Also, *Bacteroidetes* strains (Leaf176,  
427 Leaf404, and Root935) showed similar transcriptional changes in plants, but  
428 plant transcriptome changes triggered by these strains differed more (**Fig. 6A**).  
429 To get deeper insights into the relationships between plant and bacterial gene  
430 expression, we measured the correlation between gene expression changes of  
431 individual plant genes and shared bacterial OGs using co-transcriptome data of  
432 nine commensal strains. To prevent a single outlier strain from impacting  
433 correlation scores, we took a bootstrapping approach in which correlations were  
434 calculated using all the combinations of eight strains as well as all the nine

435 strains and then combined (see Methods in detail) (**Fig. 6B and Fig. S8**). This  
436 analysis revealed that the expression of a majority of plant and bacterial genes is  
437 not correlated, further indicating that the plant and bacterial responses are largely  
438 uncoupled in our dataset (**Fig. 6C**). For instance, in many cases, commensal  
439 strains that triggered similar plant transcriptional responses (e.g., Soil763 and  
440 Leaf1; **Fig. 6C**) showed distinct gene expression in plants (**Fig. 6C**). However, a  
441 subset of plant and bacterial genes showed a stronger correlation (**Fig. 6C**). KO  
442 enrichment analysis showed that expression of genes annotated as belonging to  
443 the bacterial processes “proton ATPases” and “purine metabolism” positively  
444 correlates with plant defense-related genes (**Fig. 6C**). More specifically, the  
445 expression of such bacterial genes was higher when plants showed stronger PTI  
446 activation. The biological relevance of this observation remains to be tested.  
447 Together, our data indicate that plant and bacterial gene expression can be  
448 largely uncoupled at an early stage of interaction.

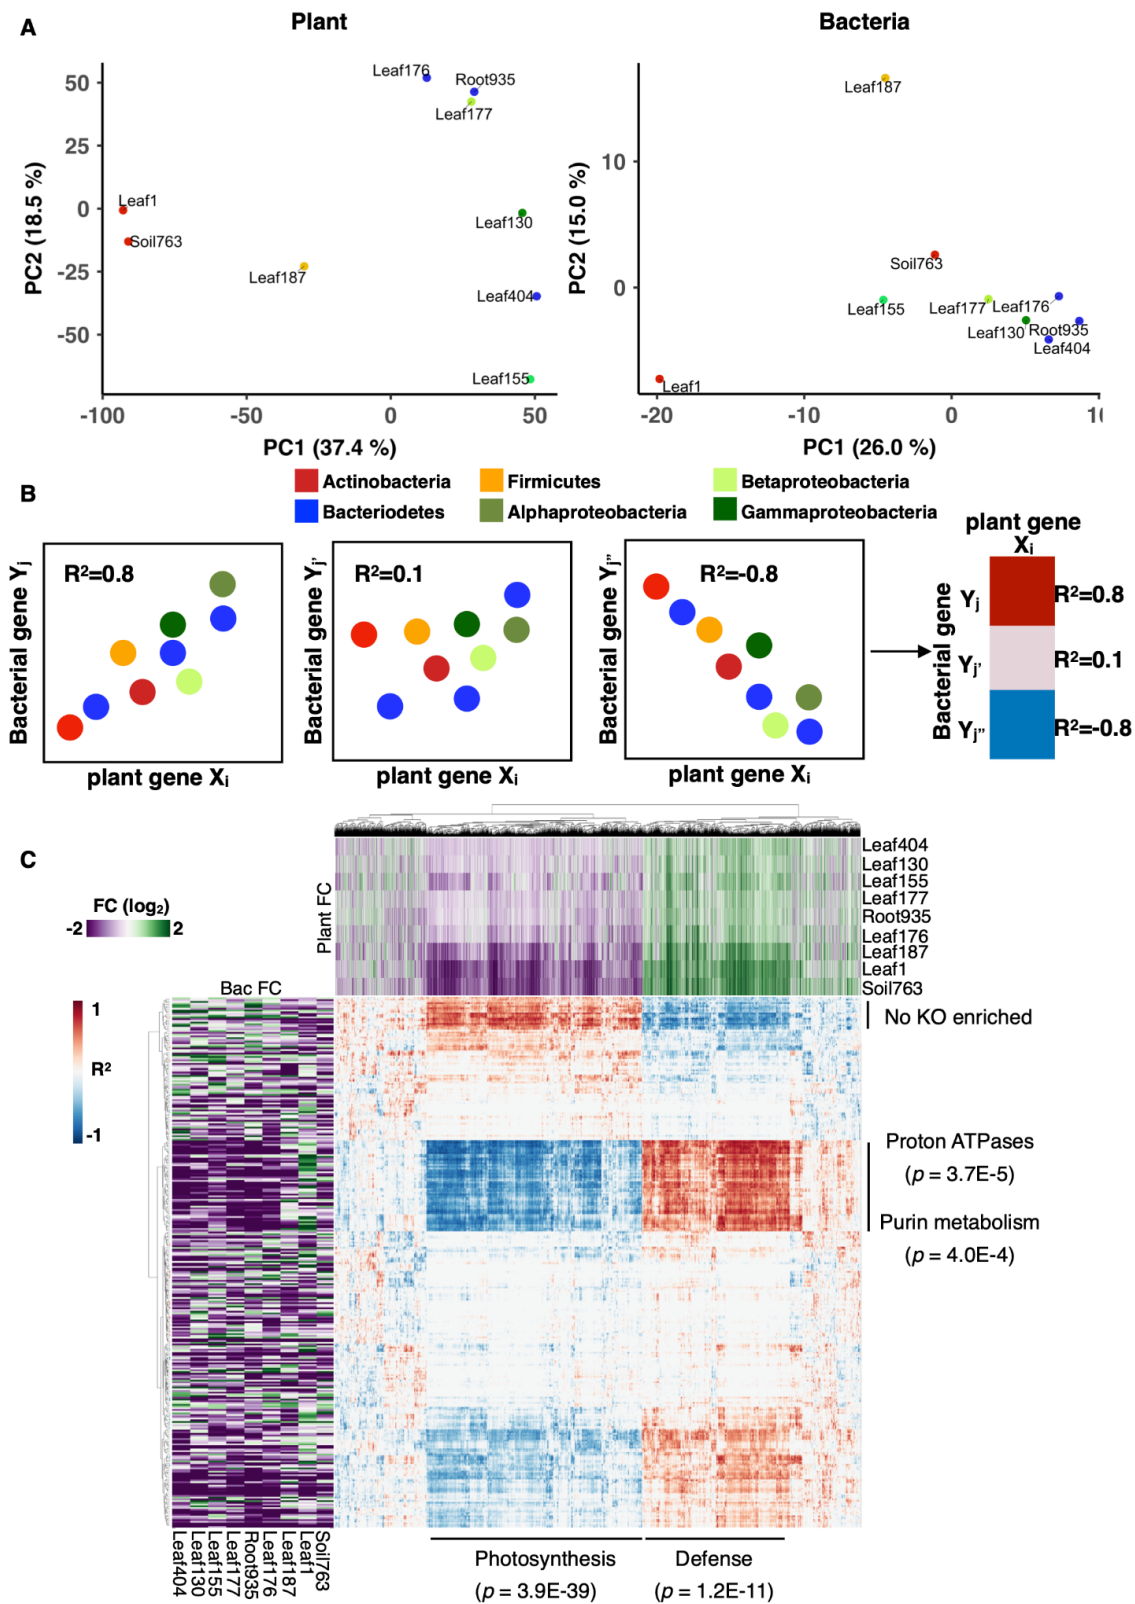

449 **Fig. 6: Plant and bacterial transcriptomes are largely uncoupled (A)**  
450 Principal component analysis of gene expression fold changes (FCs) of plants  
451 (left: bacteria-inoculated vs. water-inoculated) and bacteria (right: *in planta* vs. *in*  
452 *vitro*). Orthologous groups (OGs) of bacterial genes shared among all strains are  
453 used for the analysis. **(B)** Schematic diagram of the integration of plant and  
454 bacterial RNA-seq data. For each interaction condition, the correlation  
455 coefficients between individual plant genes and bacterial OGs were calculated.  
456 The correlation coefficient data was corrected by bootstrapping (see Methods  
457 and [Fig. S8](#)) **(C)** A map of correlation coefficients between plant genes and  
458 bacterial OGs calculated as described in **(B)**. Rows and columns are bacterial  
459 OGs and plant genes, respectively. The top and left heatmaps indicate gene  
460 expression FCs of plants and bacteria, respectively. See **Data S5** for the full  
461 correlation data. KEGG enrichment analysis was performed for the clusters of  
462 plant and bacterial genes with strong correlation.

## 463 Discussion

464 Previous studies of the plant microbiota have suggested that plants assemble  
465 bacterial communities and regulate their functions by interacting with  
466 commensals in a strain-specific manner. However, there are a limited number of  
467 studies that have interrogated the responses of plants and commensal bacteria  
468 at a genome-wide scale, and we thus have no comprehensive understanding of  
469 the two-way molecular dialogue between plants and microbiota members. Here,  
470 we profiled, for the first time, co-transcriptomes of plants and commensal  
471 bacteria under monoassociation conditions using diverse strains covering all  
472 major phyla of the plant microbiota. Our dataset demonstrated that different  
473 commensal strains 1) trigger qualitatively similar yet quantitatively different  
474 immune responses in plants and 2) show both common and highly strain-specific  
475 responses in plants.

476 We found that suppression of genes related to general metabolic activity and  
477 energy production *in planta* is a common trait among phylogenetically diverse  
478 commensals, in marked contrast to a virulent pathogen, which elicited the  
479 opposite response ([Fig. 2](#)). PTI was commonly induced by the commensal  
480 strains ([Fig. 5A](#)), suggesting that plant immunity might act to keep commensal



481 metabolic activity in check to avoid overgrowth. This notion is in line with a  
482 previous finding that commensals can proliferate in an unrestrained manner in  
483 the leaf apoplast of plant mutants lacking key immune components under high  
484 humidity, which further compromises plant immunity (Chen et al., 2020; Xin et al.,  
485 2016). Further transcriptome analysis of commensals in immunocompromised  
486 plants and environmental conditions will unravel how different immune pathways  
487 tailor their responses to effectively control commensal growth and function.

488 We provide evidence that bacterial genes enriched in the genomes of  
489 plant-adapted strains are induced *in planta* (Fig. 3A and 3B), suggesting that  
490 those genes which enable bacteria to thrive in the plant environment are indeed  
491 activated in plants. This finding is somewhat in contrast to a previous study,  
492 which showed that gene expression of a bacterial pathogen *in planta* does not  
493 correlate with fitness scores determined by transposon insertion mutagenesis  
494 (Helmann et al., 2019). Importantly, loss-of-function screening with single  
495 mutants has limitations in assigning gene function owing to functional  
496 redundancy. In this case, a gain-of-function assay is a complementary, albeit also  
497 limited, approach. For instance, we previously showed that *in planta* bacterial  
498 transcriptome data can predict bacterial genes that contribute to bacterial growth  
499 *in planta* when overexpressed (Nobori et al., 2018, 2019). It will be necessary, in  
500 the future, to rigorously validate the biological relevance of bacterial  
501 transcriptional regulation in plants at the mechanistic level.

502 We found that processes involved in the uptake of nutrients, such as sulfur,  
503 urea, and sugars, were enriched in plant-associated Alpha- and  
504 Betaproteobacteria (L155 and L177) and induced *in planta* (Fig. 4). We observed  
505 that plants induce transporters that could sequester urea and sugars from the  
506 apoplast during interactions with commensals (Fig. 4E and 4G), which potentially  
507 affects bacterial nutrient acquisition processes and eventually bacterial fitness in  
508 plants. Notably, we also found many other bacterial nutrient transporters to be  
509 regulated *in planta* in a strain-specific manner (Fig. S7). The results imply that

510 different commensals experience distinct nutrient status in the plant apoplast,  
511 which might affect bacterial fitness *in planta*. Our co-transcriptome data sets the  
512 stage for investigating whether plants control nutrient availability for particular  
513 strains to drive bacterial niche separation in plants and shape the plant  
514 microbiota.

515 We did not observe a strong association between gene expression changes in  
516 plants and commensals (**Fig. 6A and 6C**), implying that different commensals  
517 could respond divergently to similar programs of plant gene expression. This  
518 seems plausible, given that plants have to deal with complex bacterial  
519 communities residing in an area smaller than the plant cell. However, our single  
520 time point experiment does not allow us to draw a firm conclusion regarding this  
521 idea, as there may be a time lag between plant responses and bacterial  
522 responses. In the future, time-course analysis of a larger number of strains  
523 combined with plant and bacterial genetics will facilitate the prediction of  
524 biologically meaningful links between plant and bacterial responses.

525 In this study, bacterial cells were syringe-infiltrated into leaves to bypass  
526 stomatal entry as different commensals might have different abilities to access  
527 the apoplast. Transcriptomes were profiled at 6 hpi, where the population density  
528 of even the virulent pathogen *Pto* has not yet increased (Nobori et al., 2018), and  
529 thus we assumed that the population density of commensals remained the same  
530 at this time point. Therefore, our experimental setup allowed us to characterize  
531 strain-specific co-transcriptomes under controlled conditions without the influence  
532 of stomatal immunity and differences in the sizes of bacterial populations. It is,  
533 however, important to note that transcriptome analysis under more natural  
534 conditions would reveal additional layers of plant-microbiota interactions. This  
535 requires technological innovations that enable *in planta* transcriptome analysis of  
536 bacteria with much smaller populations.

537 Since plants used in this study were not grown in a strictly sterile condition,  
538 we do not exclude the possibility that the pre-existing plant microbiota influenced

539 on plant and bacterial responses. However, influence of the pre-existing  
540 microbiota on data interpretation was minimized by including the mock control  
541 (for plant transcriptomics) and randomizing sampling and taking three  
542 independent replicates (for plant and bacterial transcriptomics). We  
543 demonstrated that an *in planta* bacterial transcriptome approach can be applied  
544 to all major phyla of the plant microbiota, opening a new avenue for *in planta*  
545 transcriptome analysis of synthetic communities that are generated by mixing  
546 bacterial strains in a desired manner. This *in planta* bacterial metatranscriptome  
547 approach can capture more complex traits such as microbe-microbe interactions,  
548 which are important to understand the functions of the microbiota as a  
549 community.

550 This study has provided a wealth of information regarding gene regulation of  
551 both plants and commensals during monoassociations. In [Fig. S9-12](#), we  
552 provided additional insights on the regulation of genes related to diverse  
553 functions, including biosynthesis/metabolism of various compounds, transporters,  
554 and nucleic acid regulation. Notably, we found many genes with unknown  
555 functions to be dynamically regulated in commensals during interactions with  
556 plants ([Fig. 2G](#)). To explore these commensal functions, it will be critical in the  
557 future to link bacterial transcriptome responses to bacterial niche preference and  
558 reproductive fitness in plants. Our co-transcriptome dataset will provide a robust  
559 platform for hypothesis-driven functional investigation of plant and bacterial  
560 genes that play critical roles in plant-microbiota interactions.

561 **Acknowledgments:**

562 We thank Paul Schulze-Lefert and Julia Vorholt for providing the commensal  
563 strains, Alan Collmer for providing the Pto DC3000 D36E strain, the Max Planck  
564 Genome Centre for sequencing support, Dieter Becker, Ryosuke Kanaoka,  
565 Shinpei Shimokawa, and Ying Tang for research assistance, and Neysan  
566 Donnelly, You Lu, and Natsuki Ohmae for critical comments on the manuscript.  
567 This work was supported by the Fundamental Research Funds for the Central  
568 Universities (Program No. 2662020ZKPY009) (to K.T.), the Huazhong  
569 Agricultural University Scientific & Technological Self-innovation Foundation (to  
570 K.T.), the Max Planck Society (to R.G.-O. and K.T.), a German Research  
571 Foundation grant (SPP2125) (to R.G.-O. and K.T.), a predoctoral fellowship from  
572 the Nakajima Foundation (to T.N.), and a Chinese Scholarship Council PhD  
573 stipend (CSC Student ID 201808440401) (to Y.C.).

574 **Author contributions:**

575 T.N. and K.T. designed the research. T.N., Y.C., F.E., and Y.T. performed  
576 experiments. T.N., E.D., and R.G.O. performed analysis. T.N. and K.T. wrote the  
577 paper with input from all authors.

578 **Data availability:**

579 The RNA sequencing data used in this study are deposited in the National  
580 Center for Biotechnology Information Gene Expression Omnibus database  
581 (accession no. GSE150422). Key data and scripts are available at  
582 <https://github.com/tnobori/co-transcriptomics>.

583 **Conflict of interest:**

584 The authors declare no conflict of interest.

## 585 **Methods**

### 586 Plant materials and growth conditions

587 The *Arabidopsis thaliana* accession Col-0 plants were grown in a chamber at  
588 22°C with a 10-h light period and 60% relative humidity for 24 days and then in  
589 another chamber at 22°C with a 12-h light period and 60% relative humidity. For  
590 all experiments, 31- to 33-day-old plants were used.

### 591 Bacterial strains

592 Commensal strains were previously isolated from wild *A. thaliana* plants (Bai et  
593 al., 2015) (<http://www.at-sphere.com/>) (**Table 1**). The *Pto* mutant D36E was  
594 previously described (Wei et al., 2015). Bacterial strains were cultured at 20°C  
595 (commensal strains) or 28°C (*Pto* and D36E) at 200 rpm in liquid 50% TSB  
596 medium (Sigma-Aldrich, USA).

### 597 Sampling of bacteria *in vitro*

598 Commensal strains were grown in liquid 50% TSB medium and harvested at the  
599 late log phase. 0.1 volume of the stop buffer (95% EtOH, 5% Phenol) was added  
600 to bacterial cultures before centrifuging to collect bacterial cells. Target OD<sub>600</sub> for  
601 each strain (the late log phase): Leaf1 = 0.7, Leaf130 = 1.2, Leaf155 = 0.5,  
602 Leaf176 = 0.9, Leaf177 = 0.6, Leaf187 = 0.8, Leaf404 = 0.6, Root935 = 0.8,  
603 Soil763 = 1.8.

### 604 Bacterial inoculation to plant leaves and sampling

605 Commensal strains were grown in the liquid 50% TSB medium. For each strain,  
606 multiple cultures were prepared with different bacterial densities to ensure that  
607 unsaturated cultures were used for experiments. Bacterial cells were harvested  
608 by centrifugation, washed twice with sterile water, and resuspended in sterile

609 water to OD<sub>600</sub> of 0.5. Plants grown in pots were randomized before bacterial  
610 inoculation. For bacterial RNA-seq, 80–100 *A. thaliana* leaves (four fully  
611 expanded leaves per plant) were syringe-inoculated with bacterial suspensions  
612 using a needleless syringe. For plant RNA-seq, approximately six leaves (two  
613 fully expanded leaves per plant) were treated. Mock control (water infiltration)  
614 was included in every plant RNA-seq experiment. Leaves were harvested at 6  
615 hours after inoculation. Sampling was conducted for one plant genotype at a  
616 time, and approximately 5 min were needed per genotype. Leaves were  
617 immediately frozen in liquid nitrogen and stored at -80°C. Three biological  
618 replicates from independent experiments were taken for each condition of plant  
619 and bacterial RNA-seq.

#### 620 Sequencing library preparation and RNA sequencing

621 *In planta* bacterial transcriptome analysis was conducted as described previously  
622 (Nobori et al., 2018) with slight modifications. Briefly, bacteria-infected leaves  
623 were coarsely pulverized and released into bacterial isolation buffer (9.5%  
624 ethanol, 0.5% phenol, 25 mM TCEP (tris(2-carboxyethyl)phosphine) pH 4.5  
625 adjusted with NaOH) at 4°C, filtered, and centrifuged to isolate bacterial cells  
626 from plant cells. The original RNA extraction method based on chemical lysis of  
627 bacterial cells by TriFast (Nobori et al., 2018) did not work for some bacterial  
628 strains, thus we used FastRNA PRO™ BLUE KIT (MP Biomedicals), which  
629 involves mechanical cell lysis. rRNA was depleted to enrich mRNA, and the  
630 cDNA libraries were prepared using Ovation Complete Prokaryotic RNA-seq kit  
631 1-8 (NuGEN).

632 For plant RNA-seq, RNA was extracted with FastRNA PRO™ KIT with Lysing  
633 Matrix E (MP Biomedicals), and DNA was digested with TURBO DNase  
634 (Ambion). RNA quality was determined using a 2100 Bioanalyzer (Agilent  
635 Technologies, USA). Initially, 500 ng total RNA was used for polyA enrichment  
636 with the NEBNext® Poly(A) mRNA Magnetic Isolation Module (New England

637 Biolabs). Subsequent library preparation was performed with NEBNext® Ultra™  
638 II Directional RNA Library Prep Kit for Illumina® (New England Biolabs)  
639 according to the manufacturer's instructions.

640 Libraries were immobilized and processed onto a flow cell with cBot (Illumina)  
641 and subsequently sequenced on the HiSeq3000 system (Illumina) with 1 x 150  
642 bp single reads. Primary data analysis (incl. image analysis, cluster identification,  
643 base calling, assignment of quality scores) has been performed with RTA  
644 (real-time analysis software; Illumina) installed on the sequencing platform.

645 For bacterial and plant samples, approximately 10 and 30 million reads,  
646 respectively, were obtained. Bacterial reads were mapped onto the  
647 corresponding bacterial genomes (Bai et al., 2015) using Bowtie2 (Langmead  
648 and Salzberg, 2012). Plant reads were mapped onto the *Arabidopsis* genome  
649 (TAIR10) using HISAT2 (Kim et al., 2015). Mapped reads were counted with the  
650 Python package HTSeq (Anders et al., 2015). The RNA-seq data used in this  
651 study are deposited in NCBI Gene Expression Omnibus database (accession no.  
652 GSE150422).

### 653 Raw data

654 Raw RNA-seq count and bacterial gene annotation files are available at  
655 <https://github.com/tnobori/co-transcriptomics>.

### 656 Data analysis – plant RNA-seq

657 The statistical analysis of the RNA-seq data was performed in the R  
658 environment. Genes with average counts < 5 were excluded from the analysis.  
659 The count data were TMM-normalized and log-transformed using the function  
660 `calcNormFactors` in the package `edgeR` (Robinson et al., 2010) and the function  
661 `voomWithQualityWeights` in the package `limma` (Ritchie et al., 2015),  
662 respectively. To each gene, a linear model was fitted by using the function `lmFit`  
663 in the `limma` package (Ritchie et al., 2015). The `eBayes` function in the `limma`

664 package was used for variance shrinkage during the calculation of the p-values.  
665 The false discovery rate (FDR; the Storey's q-values) was calculated using the  
666 qvalue function in the qvalue package (Storey and Tibshirani, 2003). Genes with  
667 q-value <0.01 and  $|\log_2$  fold change| > 1 were defined as differentially expressed  
668 genes. The prcomp function was used for principal component analysis.  
669 Heatmaps were created with the pheatmap function in the R environment.  
670 Enriched GO terms were identified using the BiNGO plugin for Cytoscape (Maere  
671 et al., 2005). Scatter plots and box plots were generated using the R-package  
672 ggplot2.

673 Data analysis – bacterial RNA-seq

#### 674 **Bacterial phylogenetic analysis**

675 The bacterial genomes were searched for the bacterial small ribosomal subunit  
676 16S rRNA gene using RNAmmer (Lagesen et al., 2007). Next, a multiple  
677 sequence alignment was performed using Clustal Omega (Sievers et al., 2011)  
678 with default parameters. Finally, we employed FastTree (Price et al., 2010) to  
679 build a maximum-likelihood phylogeny based on the gamma time reversible  
680 substitution model (GTR). This tree was visualized (Fig. 1B) using the interactive  
681 Tree of Life (Letunic and Bork, 2019).

#### 682 **Orthologous gene prediction and KEGG annotation**

683 De novo orthology prediction was performed by using OrthoFinder (Emms and  
684 Kelly, 2015) with default parameters on the predicted protein coding sequences  
685 from the bacterial genomes. Individual genes were annotated with the KEGG  
686 database as a reference (Kanehisa et al., 2014) using the blastkoala webserver  
687 (Prokaryotes group) (Kanehisa et al., 2016). Subsequently, orthologous genes  
688 were assigned a single KO annotation by majority vote of individually annotated  
689 sequences in each group. The genomes of the commensal strains were



690 previously reported (Bai et al., 2015) and are available at our GitHub repository  
691 (<https://github.com/tnobori/co-transcriptomics>).

## 692 **Data normalization and visualization**

693 RNA-seq data were normalized for each strain. After omitting genes with average  
694 count < 5, count data was TMM-normalized and log-transformed as described  
695 above. Genes with FDR < 0.01 (corrected by Benjamini-Hochberg method) and  
696  $|\log_2 \text{ fold change}| > 1$  were defined as differentially expressed genes.  
697 Commensal genes were annotated with OGs to integrate gene expression data  
698 of different strains. When multiple genes are annotated with the same OG, the  
699 mean expression value was taken. Data visualization was performed as  
700 described above. UpSet plots were generated in the R environment using the  
701 package UpSetR (Conway et al., 2017).

## 702 KO enrichment analysis (related to [Fig. 2A](#) and [Fig. S3A](#))

703 A custom KEGG ontology (KO) database was created by taking only functional  
704 terms encoded in at least one bacterial genome (downloaded in January 2019).  
705 For each strain, a list of KOs was generated by subsetting the corresponding  
706 KEGG IDs from the custom KO database (**Data S6**). KO enrichment test was  
707 performed using a hypergeometric test (FDR corrected by Benjamini-Hochberg  
708 method). KOs with FDR < 0.01 and containing more than three genes were  
709 defined as significantly enriched KOs. An R script and KO databases are  
710 available at <https://github.com/tnobori/co-transcriptomics>.

## 711 Generating plots of genes with various functions (related to [Fig. 2B-G](#), [Fig. 4B-D](#) 712 [and F](#), [Fig. S3B and C](#), [Fig. S6](#), [Fig. S7](#), [Fig. S9-12](#))

713 Bacterial genes were selected by KEGG pathway annotations or keyword  
714 searches from KEGG BRITE annotations. R scripts for this analysis are available  
715 at <https://github.com/tnobori/co-transcriptomics>.

716 Intersecting plant-associated bacterial genes and differentially regulated genes in  
717 *planta* (related to [Fig. 3](#))

718 In a previous study (Levy et al., 2017), comparative genomics analyses defined  
719 “plant-associated (PA) genes” for each phylum/class using multiple statistical  
720 tests. The study defined two groups of Actinobacteria (Actinobacteria1 and  
721 Actinobacteria2). The Actinobacteria strains used in the present study are all  
722 Actinobacteria1). We defined genes that passed at least one statistical test as  
723 “PA genes” and the others were defined as nonPA genes. An R script and  
724 PA-gene datasets for this analysis are available at  
725 <https://github.com/tnobori/co-transcriptomics>.

726 MAMP conservation analysis (related to [Fig. 5D](#))

727 Canonical flg22 and elf18 sequences were blasted against the bacterial  
728 genomes using blastp (Camacho et al., 2009) with standard settings. The results  
729 of these homology searches were filtered by retaining hits covering at least 90%  
730 of the length of the MAMP sequence in the alignment and subsequently  
731 retrieving the alignment with the highest percentage identity.

732 Integration of plant and bacterial RNA-seq data (related to [Fig. 6](#))

733 Co-transcriptome fold change data (bacteria: *in planta* vs. *in vitro*; plants: bacteria  
734 vs. mock) of nine strains were used for this analysis. Plant genes whose  
735 expression was significantly changed by at least one strain were used. Pearson’s  
736 correlation coefficients between individual plant genes and bacterial OGs were  
737 calculated. The same analysis was performed for all the combinations of eight  
738 strains (bootstrapping). Among these 8-strain and 9-strain datasets, the weakest  
739 correlation coefficient value was used for each combination of a bacterial OG and  
740 a plant gene (Fig. S8). An R script and plant/bacterial gene expression datasets  
741 for this analysis are available at <https://github.com/tnobori/co-transcriptomics>.

742 **Determination of bacterial colony forming units (related to Fig. S1)**

743 Bacterial colonization of the leaves was determined following a previous study  
744 (Chen et al., 2020) with slight modifications. The Cl<sub>2</sub>-gas-sterilized seeds were  
745 stratified for 2 days at 4°C, sown on half Murashige & Skoogs (MS,  
746 Duchefa-Biochemie, MO255.0050) agar medium with 1% sucrose, and allowed  
747 to germinate for 5 days. Seedlings of the same physiological state were  
748 transplanted on half MS agar medium and were grown for another 9 days (a total  
749 of 2 weeks) prior to inoculation with bacteria. One day before inoculation,  
750 bacterial cultures were grown on half TSB for 24 hours at 22°C with 200 rpm  
751 shaking. On the day of inoculation, bacterial cells were harvested by  
752 centrifugation at 3000 rpm for 15 min, washed twice with sterile water, and then  
753 finally suspended in 10 mM MgCl<sub>2</sub>. The resulting bacterial suspensions were  
754 diluted to a final OD<sub>600</sub> of 0.5 with sterile water and with this, each plate of  
755 2-week-old seedlings was flood-inoculated for 1 min, drained, and allowed to dry  
756 for 15 min. Plants were then grown for 3 days and 2-3 leaves of the same  
757 physiological state were harvested aseptically and weighed. To quantify bacteria  
758 in the endophytic compartment, leaves were surface-sterilized with 75% ethanol  
759 for 30 seconds and washed twice with sterile water, and the leaves were  
760 homogenized on 10 mM MgCl<sub>2</sub> buffer using TissueLyserII (Qiagen) with the  
761 frequency of 30 s<sup>-1</sup> for 5 min. The samples were then serially diluted (10<sup>0</sup> to 10<sup>5</sup>)  
762 and spread-plated on 0.5x TSB agar medium. Plates were incubated at ambient  
763 temperature, colonies were observed and counted for 1-3 d and colony forming  
764 units were expressed per mg FW. The total compartment was assayed similarly  
765 but without surface sterilization.

766 Data S1 OG distribution

767 Data S2 Expression of all OGs

768 Data S3 List of PA and nonPA KOs

769 Data S4 Plant RNA-seq data

770 Data S5 Correlation matrix of plant and bacterial transcriptomes

771 Data S6 KO database for each strain

## 772 References

- 773 Anders, S., Pyl, P.T., and Huber, W. (2015). HTSeq—a Python framework to work with  
774 high-throughput sequencing data. *Bioinformatics* 31, 166–169.
- 775 Bai, Y., Müller, D.B., Srinivas, G., Garrido-Oter, R., Potthoff, E., Rott, M., Dombrowski,  
776 N., Münch, P.C., Spaepen, S., Remus-Emsermann, M., et al. (2015). Functional overlap  
777 of the Arabidopsis leaf and root microbiota. *Nature* 528, 364–369.
- 778 Boller, T., and Felix, G. (2009). A renaissance of elicitors: perception of  
779 microbe-associated molecular patterns and danger signals by pattern-recognition  
780 receptors. *Annu. Rev. Plant Biol.* 60, 379–406.
- 781 Camacho, C., Coulouris, G., Avagyan, V., Ma, N., Papadopoulos, J., Bealer, K., and  
782 Madden, T.L. (2009). BLAST+: architecture and applications. *BMC Bioinformatics* 10,  
783 421.
- 784 Carrión, V.J., Perez-Jaramillo, J., Cordovez, V., Tracanna, V., de Hollander, M.,  
785 Ruiz-Buck, D., Mendes, L.W., van Ijcken, W.F.J., Gomez-Exposito, R., Elsayed, S.S., et  
786 al. (2019). Pathogen-induced activation of disease-suppressive functions in the  
787 endophytic root microbiome. *Science* 366, 606–612.
- 788 Chapelle, E., Alunni, B., Malfatti, P., Solier, L., Pédrón, J., Kraepiel, Y., and Van  
789 Gijsegem, F. (2015). A straightforward and reliable method for bacterial in planta  
790 transcriptomics: application to the *Dickeya dadantii*/Arabidopsis thaliana pathosystem.  
791 *Plant J.* 82, 352–362.
- 792 Chen, L.-Q., Hou, B.-H., Lalonde, S., Takanaga, H., Hartung, M.L., Qu, X.-Q., Guo,  
793 W.-J., Kim, J.-G., Underwood, W., Chaudhuri, B., et al. (2010). Sugar transporters for  
794 intercellular exchange and nutrition of pathogens. *Nature* 468, 527–532.
- 795 Chen, T., Nomura, K., Wang, X., Sohrabi, R., Xu, J., Yao, L., Paasch, B.C., Ma, L.,  
796 Kremer, J., Cheng, Y., et al. (2020). A plant genetic network for preventing dysbiosis in  
797 the phyllosphere. *Nature* 580, 653–657.
- 798 Conway, J.R., Lex, A., and Gehlenborg, N. (2017). UpSetR: an R package for the  
799 visualization of intersecting sets and their properties. *Bioinformatics* 33, 2938–2940.
- 800 Costa, T.R.D., Felisberto-Rodrigues, C., Meir, A., Prevost, M.S., Redzej, A., Trokter, M.,  
801 and Waksman, G. (2015). Secretion systems in Gram-negative bacteria: structural and  
802 mechanistic insights. *Nat. Rev. Microbiol.* 13, 343–359.
- 803 Durán, P., Thiergart, T., Garrido-Oter, R., Agler, M., Kemen, E., Schulze-Lefert, P., and  
804 Hacquard, S. (2018). Microbial Interkingdom Interactions in Roots Promote Arabidopsis  
805 Survival. *Cell* 175, 973–983.e14.
- 806 Emms, D.M., and Kelly, S. (2015). OrthoFinder: solving fundamental biases in whole  
807 genome comparisons dramatically improves orthogroup inference accuracy. *Genome*

808 Biol. 16, 1–14.

809 Felix, G., Duran, J.D., Volko, S., and Boller, T. (1999). Plants have a sensitive perception  
810 system for the most conserved domain of bacterial flagellin. *Plant J.* 18, 265–276.

811 Garrido-Oter, R., Nakano, R.T., Dombrowski, N., Ma, K.-W., AgBiome Team, McHardy,  
812 A.C., and Schulze-Lefert, P. (2018). Modular Traits of the Rhizobiales Root Microbiota  
813 and Their Evolutionary Relationship with Symbiotic Rhizobia. *Cell Host Microbe* 24,  
814 155–167.e5.

815 Hacquard, S., Garrido-Oter, R., González, A., Spaepen, S., Ackermann, G., Lebeis, S.,  
816 McHardy, A.C., Dangl, J.L., Knight, R., Ley, R., et al. (2015). Microbiota and Host  
817 Nutrition across Plant and Animal Kingdoms. *Cell Host & Microbe* 17, 603–616.

818 Hacquard, S., Spaepen, S., Garrido-Oter, R., and Schulze-Lefert, P. (2017). Interplay  
819 Between Innate Immunity and the Plant Microbiota. *Annu. Rev. Phytopathol.* 55,  
820 565–589.

821 Helmann, T.C., Deutschbauer, A.M., and Lindow, S.E. (2019). Genome-wide  
822 identification of *Pseudomonas syringae* genes required for fitness during colonization of  
823 the leaf surface and apoplast. *Proc. Natl. Acad. Sci. U. S. A.* 116, 18900–18910.

824 Hillmer, R.A., Tsuda, K., Rallapalli, G., Asai, S., Truman, W., Papke, M.D., Sakakibara,  
825 H., Jones, J.D.G., Myers, C.L., and Katagiri, F. (2017). The highly buffered Arabidopsis  
826 immune signaling network conceals the functions of its components. *PLOS Genetics* 13,  
827 e1006639.

828 Jones, J.D.G., and Dangl, J.L. (2006). The plant immune system. *Nature* 444, 323–329.

829 Kanehisa, M., Goto, S., Sato, Y., Kawashima, M., Furumichi, M., and Tanabe, M. (2014).  
830 Data, information, knowledge and principle: back to metabolism in KEGG. *Nucleic Acids*  
831 *Res.* 42, D199–D205.

832 Kanehisa, M., Sato, Y., and Morishima, K. (2016). BlastKOALA and GhostKOALA:  
833 KEGG Tools for Functional Characterization of Genome and Metagenome Sequences.  
834 *J. Mol. Biol.* 428, 726–731.

835 Kim, D., Langmead, B., and Salzberg, S.L. (2015). HISAT: a fast spliced aligner with low  
836 memory requirements. *Nat. Methods* 12, 357–360.

837 Kunze, G., Zipfel, C., Robatzek, S., Niehaus, K., Boller, T., and Felix, G. (2004). The N  
838 terminus of bacterial elongation factor Tu elicits innate immunity in Arabidopsis plants.  
839 *Plant Cell* 16, 3496–3507.

840 Kwak, M.-J., Kong, H.G., Choi, K., Kwon, S.-K., Song, J.Y., Lee, J., Lee, P.A., Choi, S.Y.,  
841 Seo, M., Lee, H.J., et al. (2018). Rhizosphere microbiome structure alters to enable wilt  
842 resistance in tomato. *Nat. Biotechnol.*

843 Lagesen, K., Hallin, P., Rødland, E.A., Staerfeldt, H.-H., Rognes, T., and Ussery, D.W.  
844 (2007). RNAmmer: consistent and rapid annotation of ribosomal RNA genes. *Nucleic*

- 845 *Acids Res.* **35**, 3100–3108.
- 846 Langmead, B., and Salzberg, S.L. (2012). Fast gapped-read alignment with Bowtie 2.  
847 *Nat. Methods* **9**, 357–359.
- 848 Lebeis, S.L., Paredes, S.H., Lundberg, D.S., Breakfield, N., Gehring, J., McDonald, M.,  
849 Malfatti, S., del Rio, T.G., Jones, C.D., Tringe, S.G., et al. (2015). Salicylic acid  
850 modulates colonization of the root microbiome by specific bacterial taxa. *Science* **349**,  
851 860–864.
- 852 Letunic, I., and Bork, P. (2019). Interactive Tree Of Life (iTOL) v4: recent updates and  
853 new developments. *Nucleic Acids Res.* **47**, W256–W259.
- 854 Levy, A., Salas Gonzalez, I., Mittelviehhaus, M., Clingenpeel, S., Herrera Paredes, S.,  
855 Miao, J., Wang, K., Devescovi, G., Stillman, K., Monteiro, F., et al. (2017). Genomic  
856 features of bacterial adaptation to plants. *Nat. Genet.* **50**, 138–150.
- 857 Levy, A., Conway, J.M., Dangl, J.L., and Woyke, T. (2018). Elucidating Bacterial Gene  
858 Functions in the Plant Microbiome. *Cell Host Microbe* **24**, 475–485.
- 859 Lovelace, A.H., Smith, A., and Kvitko, B.H. (2018). Pattern-Triggered Immunity Alters the  
860 Transcriptional Regulation of Virulence-Associated Genes and Induces the Sulfur  
861 Starvation Response in *Pseudomonas syringae* pv. tomato DC3000. *Mol. Plant.*  
862 *Microbe. Interact.* **31**, 750–765.
- 863 Maere, S., Heymans, K., and Kuiper, M. (2005). BiNGO: a Cytoscape plugin to assess  
864 overrepresentation of gene ontology categories in biological networks. *Bioinformatics* **21**,  
865 3448–3449.
- 866 Müller, D.B., Schubert, O.T., Röst, H., Aebersold, R., and Vorholt, J.A. (2016).  
867 Systems-level Proteomics of Two Ubiquitous Leaf Commensals Reveals  
868 Complementary Adaptive Traits for Phyllosphere Colonization. *Mol. Cell. Proteomics* **15**,  
869 3256–3269.
- 870 Nobori, T., Velásquez, A.C., Wu, J., Kvitko, B.H., Kremer, J.M., Wang, Y., He, S.Y., and  
871 Tsuda, K. (2018). Transcriptome landscape of a bacterial pathogen under plant  
872 immunity. *Proc. Natl. Acad. Sci. U. S. A.* **115**, E3055–E3064.
- 873 Nobori, T., Wang, Y., Wu, J., Stolze, S.C., and Tsuda, Y. (2019). In planta bacterial  
874 multi-omics analysis illuminates regulatory principles underlying plant-pathogen  
875 interactions. *BioRxiv*.
- 876 Nobori, T., Wang, Y., Wu, J., Stolze, S.C., Tsuda, Y., Finkemeier, I., Nakagami, H., and  
877 Tsuda, K. (2020). Multidimensional gene regulatory landscape of a bacterial pathogen in  
878 plants. *Nat Plants* **6**, 883–896.
- 879 Osborne, A.R., Rapoport, T.A., and van den Berg, B. (2005). Protein translocation by the  
880 Sec61/SecY channel. *Annu. Rev. Cell Dev. Biol.* **21**, 529–550.
- 881 Price, M.N., Dehal, P.S., and Arkin, A.P. (2010). FastTree 2--approximately

- 882 maximum-likelihood trees for large alignments. *PLoS One* 5.
- 883 Ritchie, M.E., Phipson, B., Wu, D., Hu, Y., Law, C.W., Shi, W., and Smyth, G.K. (2015).  
884 limma powers differential expression analyses for RNA-sequencing and microarray  
885 studies. *Nucleic Acids Res.* 43, e47.
- 886 Robinson, M.D., McCarthy, D.J., and Smyth, G.K. (2010). edgeR: a Bioconductor  
887 package for differential expression analysis of digital gene expression data.  
888 *Bioinformatics* 26, 139–140.
- 889 Russell, A.B., Peterson, S.B., and Mougous, J.D. (2014). Type VI secretion system  
890 effectors: poisons with a purpose. *Nat. Rev. Microbiol.* 12, 137–148.
- 891 Sievers, F., Wilm, A., Dineen, D., Gibson, T.J., Karplus, K., Li, W., Lopez, R., McWilliam,  
892 H., Remmert, M., Söding, J., et al. (2011). Fast, scalable generation of high-quality  
893 protein multiple sequence alignments using Clustal Omega. *Mol. Syst. Biol.* 7.
- 894 Storey, J.D., and Tibshirani, R. (2003). Statistical significance for genomewide studies.  
895 *Proc. Natl. Acad. Sci. U. S. A.* 100, 9440–9445.
- 896 Teixeira, P.J.P.L., Teixeira, P.J.P., Colaianni, N.R., Law, T.F., Conway, J.M., Gilbert, S., Li,  
897 H., Salas-González, I., Panda, D., Del Risco, N.M., et al. (2021). Specific modulation of  
898 the root immune system by a community of commensal bacteria. *Proceedings of the*  
899 *National Academy of Sciences* 118, e2100678118.
- 900 Toruño, T.Y., Stergiopoulos, I., and Coaker, G. (2016). Plant-Pathogen Effectors: Cellular  
901 Probes Interfering with Plant Defenses in Spatial and Temporal Manners. *Annu. Rev.*  
902 *Phytopathol.* 54, 419–441.
- 903 Vogel, C., Bodenhausen, N., Grisse, W., and Vorholt, J.A. (2016). The Arabidopsis  
904 leaf transcriptome reveals distinct but also overlapping responses to colonization by  
905 phyllosphere commensals and pathogen infection with impact on plant health. *New*  
906 *Phytologist* 212, 192–207.
- 907 Wei, H.-L., Chakravarthy, S., Mathieu, J., Helmann, T.C., Stodghill, P., Swingle, B.,  
908 Martin, G.B., and Collmer, A. (2015). *Pseudomonas syringae* pv. tomato DC3000 Type  
909 III Secretion Effector Polymutants Reveal an Interplay between HopAD1 and AvrPtoB.  
910 *Cell Host & Microbe* 17, 752–762.
- 911 Xin, X.-F., Nomura, K., Aung, K., Velásquez, A.C., Yao, J., Boutrot, F., Chang, J.H.,  
912 Zipfel, C., and He, S.Y. (2016). Bacteria establish an aqueous living space in plants  
913 crucial for virulence. *Nature* 539, 524–529.
- 914 Yamada, K., Saijo, Y., Nakagami, H., and Takano, Y. (2016). Regulation of sugar  
915 transporter activity for antibacterial defense in Arabidopsis. *Science* 354, 1427–1430.
- 916 Young, G.M., Amid, D., and Miller, V.L. (1996). A bifunctional urease enhances survival  
917 of pathogenic *Yersinia enterocolitica* and *Morganella morganii* at low pH. *J. Bacteriol.*  
918 178, 6487–6495.



919 Yu, K., Liu, Y., Tichelaar, R., Savant, N., Lagendijk, E., van Kuijk, S.J.L., Stringlis, I.A.,  
920 van Dijken, A.J.H., Pieterse, C.M.J., Bakker, P.A.H.M., et al. (2019).  
921 Rhizosphere-Associated *Pseudomonas* Suppress Local Root Immune Responses by  
922 Gluconic Acid-Mediated Lowering of Environmental pH. *Curr. Biol.* 29, 3913–3920.e4.

923 Yu, X., Lund, S.P., Scott, R. a., Greenwald, J.W., Records, A.H., Nettleton, D., Lindow,  
924 S.E., Gross, D.C., and Beattie, G. a. (2013). Transcriptional responses of *Pseudomonas*  
925 *syringae* to growth in epiphytic versus apoplastic leaf sites. *Proc. Natl. Acad. Sci. U. S.*  
926 *A.* 110, E425–E434.

927 Yu, X., Lund, S.P., Greenwald, J.W., Records, A.H., Scott, R.A., Nettleton, D., Lindow,  
928 S.E., Gross, D.C., and Beattie, A. (2014). Transcriptional Analysis of the Global  
929 Regulatory Networks Active in *Pseudomonas syringae* during Leaf Colonization. *MBio* 5,  
930 01614–e01683.

## 931 Supplementary figures

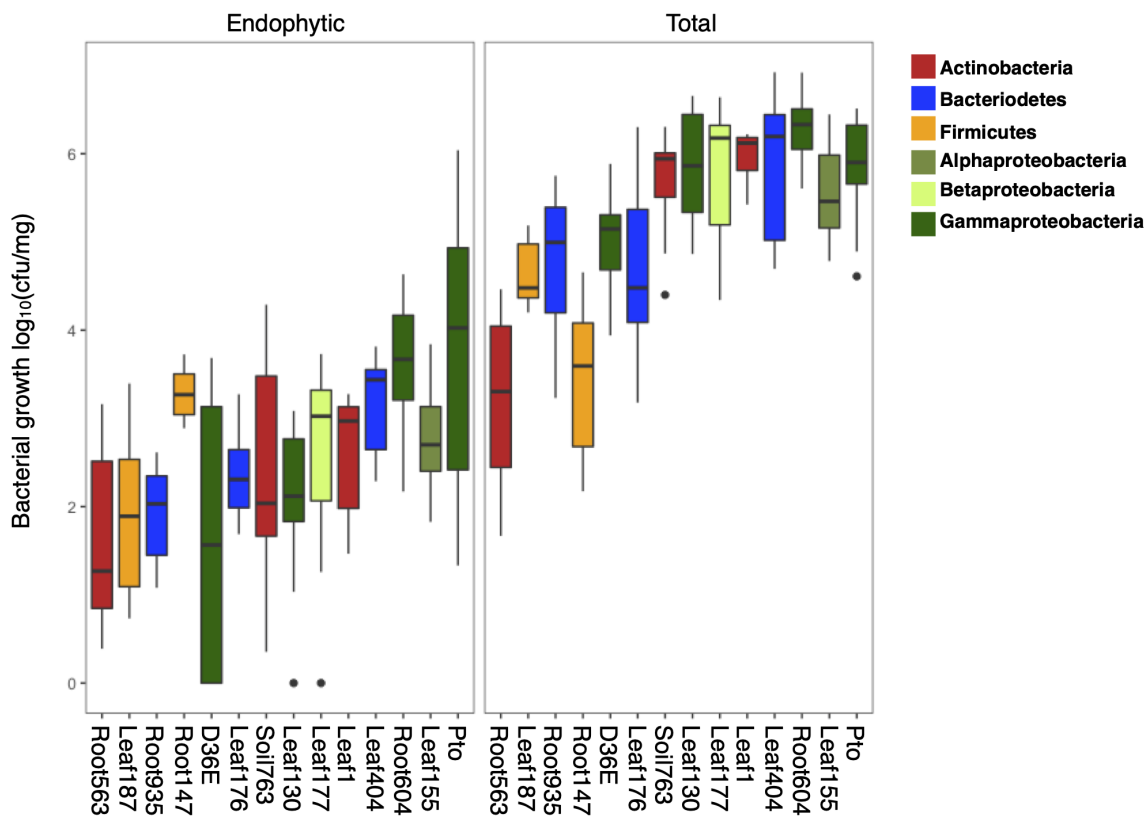

932 **Fig. S1 Bacterial growth in plant leaves** Bacteria were flood-inoculated to  
933 three-week-old *A. thaliana* Col-0 at OD<sub>600</sub> = 0.5. Bacterial growth was measured  
934 three days after inoculation. Endophytic bacteria were counted after washing and  
935 sterilizing the leaf surface, whereas total bacteria were counted without any  
936 surface washing and sterilization (see Methods).

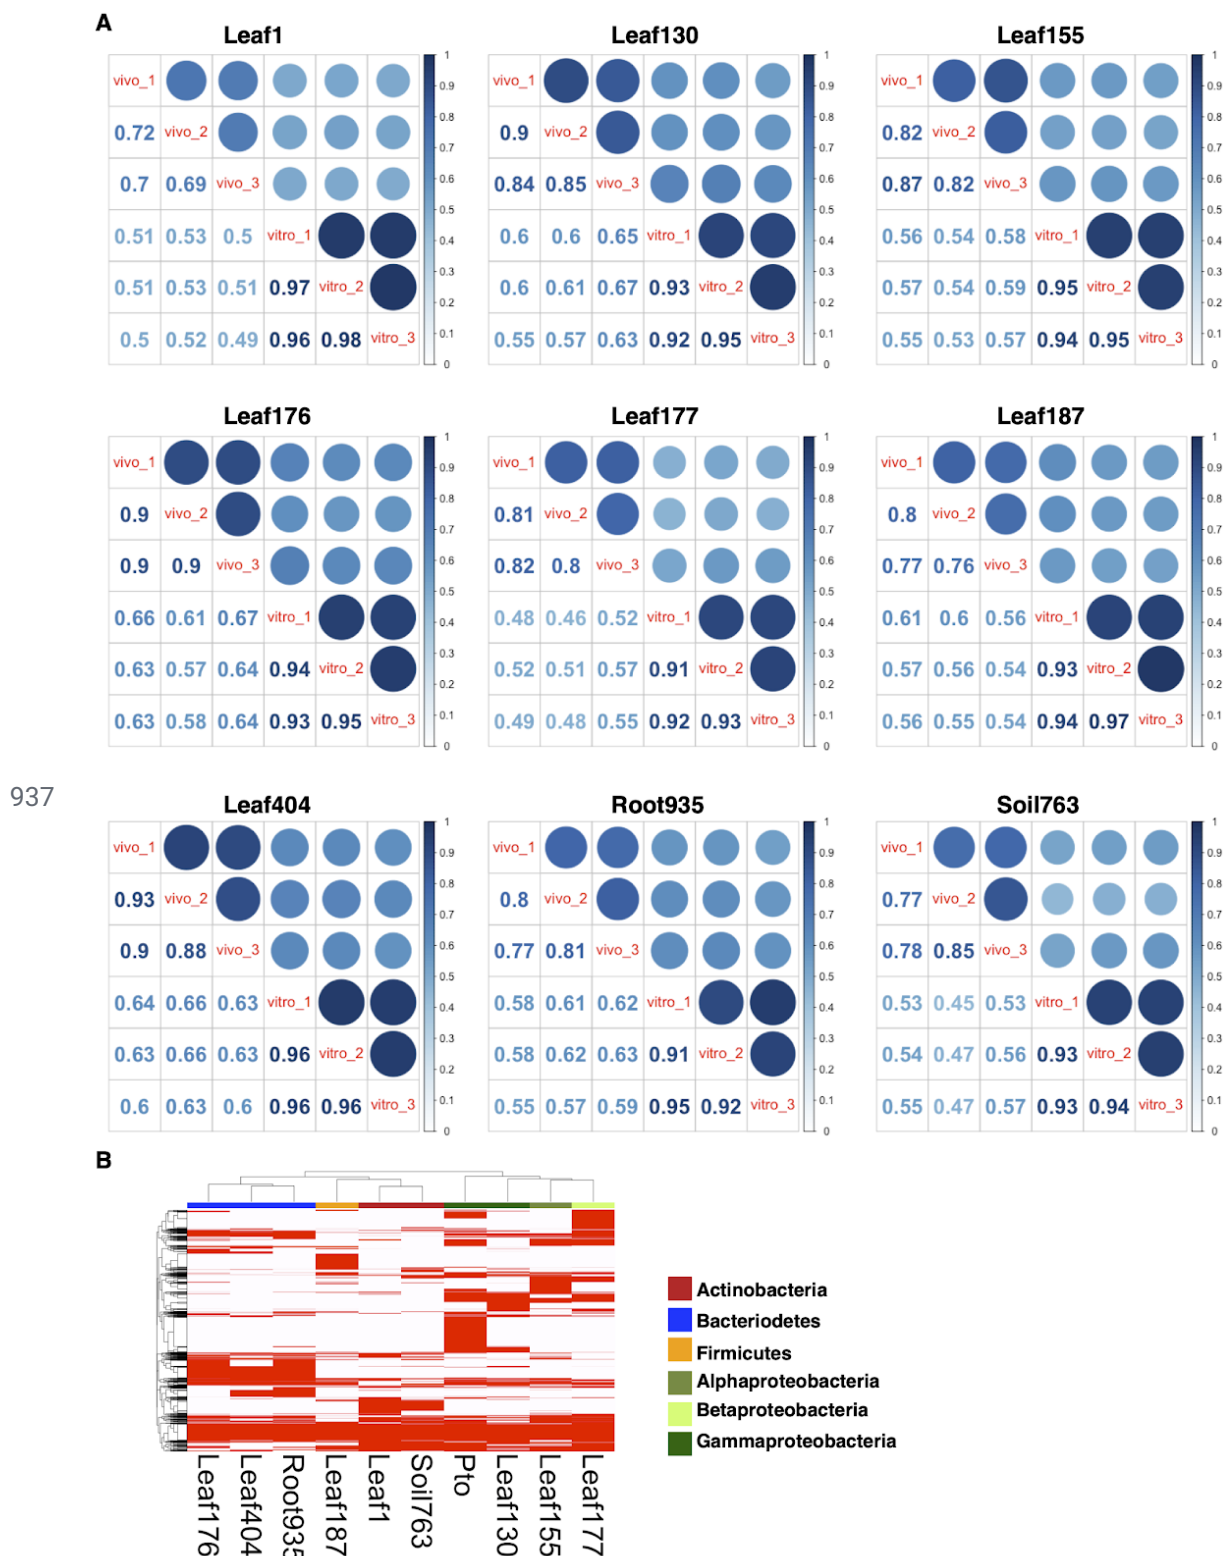

941 taxonomic affiliation (phylum/class level) of each strain is indicated with different  
942 colors. See **Data S1** for the gene presence-absence table.

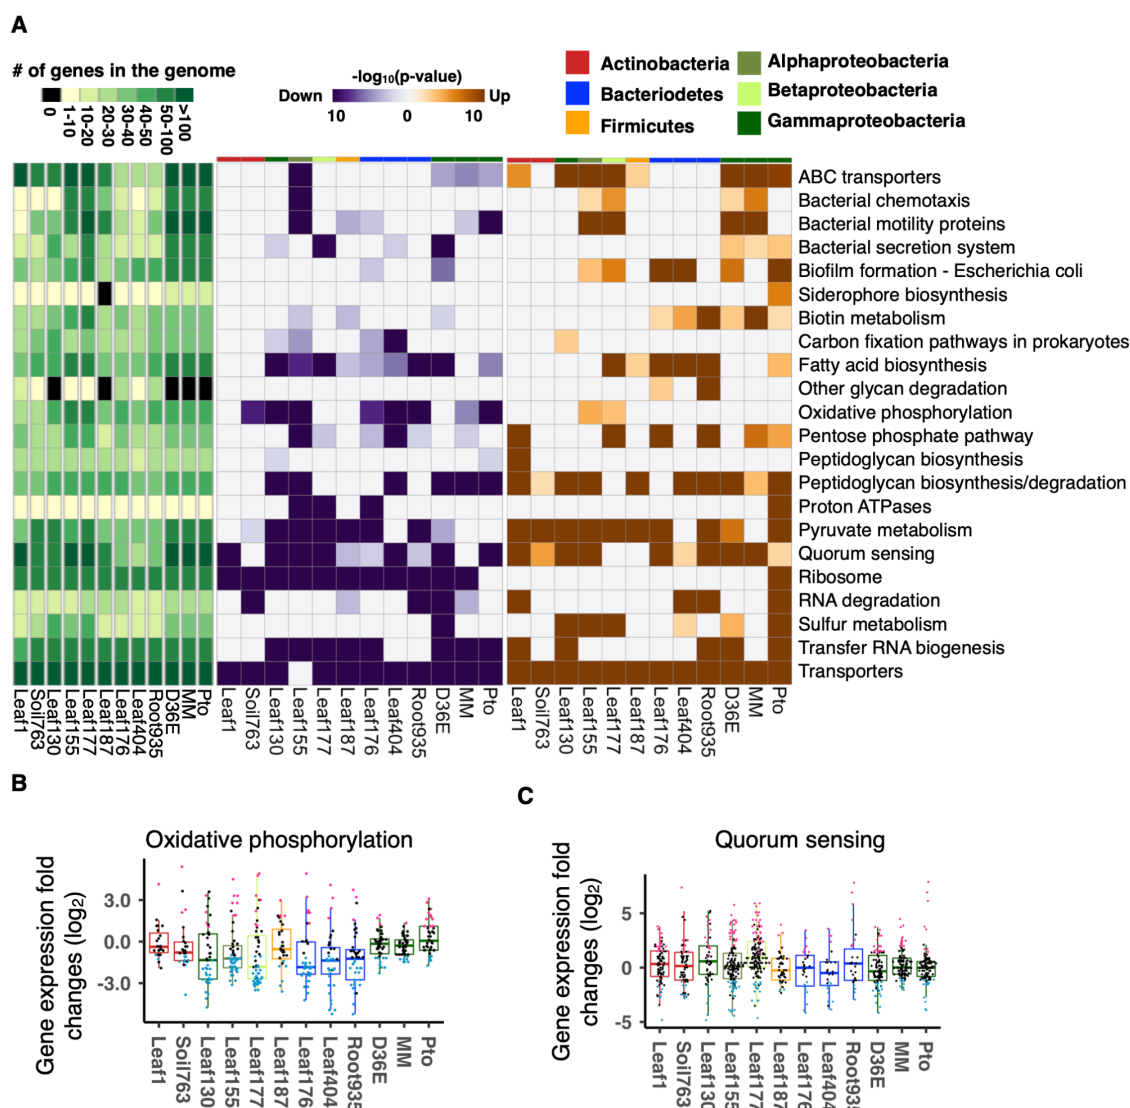

943 **Fig. S3: Conserved and strain-specific regulation of bacterial functions in**  
 944 **plants (A)** KEGG ontology (KO) terms enriched in genes that are significantly  
 945 up- (orange) or down (purple)-regulated *in planta* compared with *in vitro* (rich  
 946 media). The heatmaps indicate  $-\log_{10}$  p-values (FDR corrected by  
 947 Benjamini-Hochberg method). The top color bars indicate the taxonomic  
 948 affiliation (phylum/class level) of each strain. **(B and C)** Expression fold changes  
 949 (*in planta* vs. *in vitro*) of genes involved in **(B)** Oxidative phosphorylation and **(C)**  
 950 Quorum sensing. MM, *Pto* grown in a minimal medium. Results are shown as  
 951 box plots with boxes displaying the 25th–75th percentiles, the centerline  
 952 indicating the median, whiskers extending to the minimum, and maximum values  
 953 no further than 1.5 inter-quartile range. Box color indicates the taxonomic  
 954 affiliation (phylum/class level) of each strain. All individual data points (genes)  
 955 overlaid with colors for DEGs (red: upregulated, blue: downregulated, black:  
 956 non-DEG).

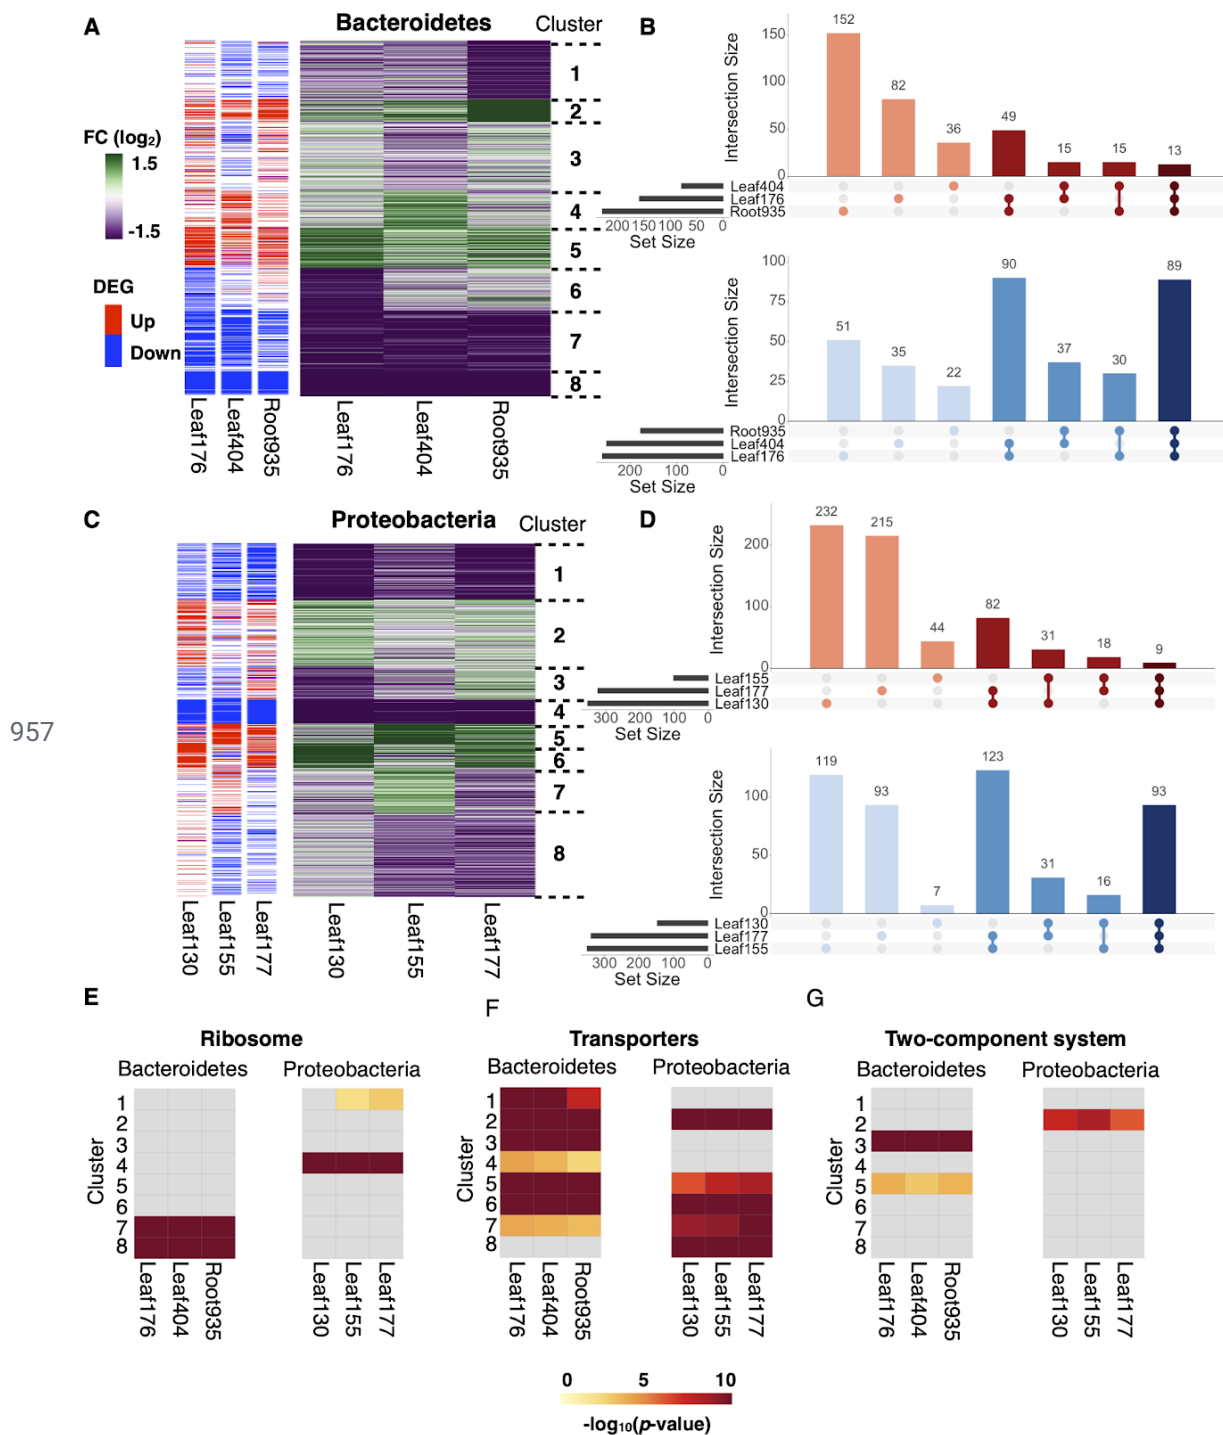

958 **Fig. S4: Intrapylum comparative transcriptomics of commensals (A and C)**  
 959 Gene expression fold changes between *in planta* and *in vitro* (rich media) of (A)  
 960 Bacteroidetes and (C) Proteobacteria strains. Orthologous groups shared among  
 961 three strains were used for the analysis. Differentially expressed genes (DEGs)  
 962 (*in planta* vs. *in vitro*;  $|\log_2FC| > 1$ ; FDR < 0.01; two-tailed Student's t test  
 963 followed by Storey's q-value) are indicated in the sidebars. Gene clusters defined  
 964 by k-mean clustering are shown (k = 8). (B and D) UpSet intersection plots of

965 DEGs either up- (red) or down (blue)-regulated *in planta* in the **(B)** Bacteroidetes  
966 and **(D)** Proteobacteria strains. Intersection size and set size indicate the number  
967 of shared DEGs and the number of DEGs in each strain, respectively. **(E-G)**  
968 Enrichment analysis of genes with the KEGG ontology terms **(E)** “Ribosome”, **(F)**  
969 “Transporters”, and **(G)** “Two-component system”.

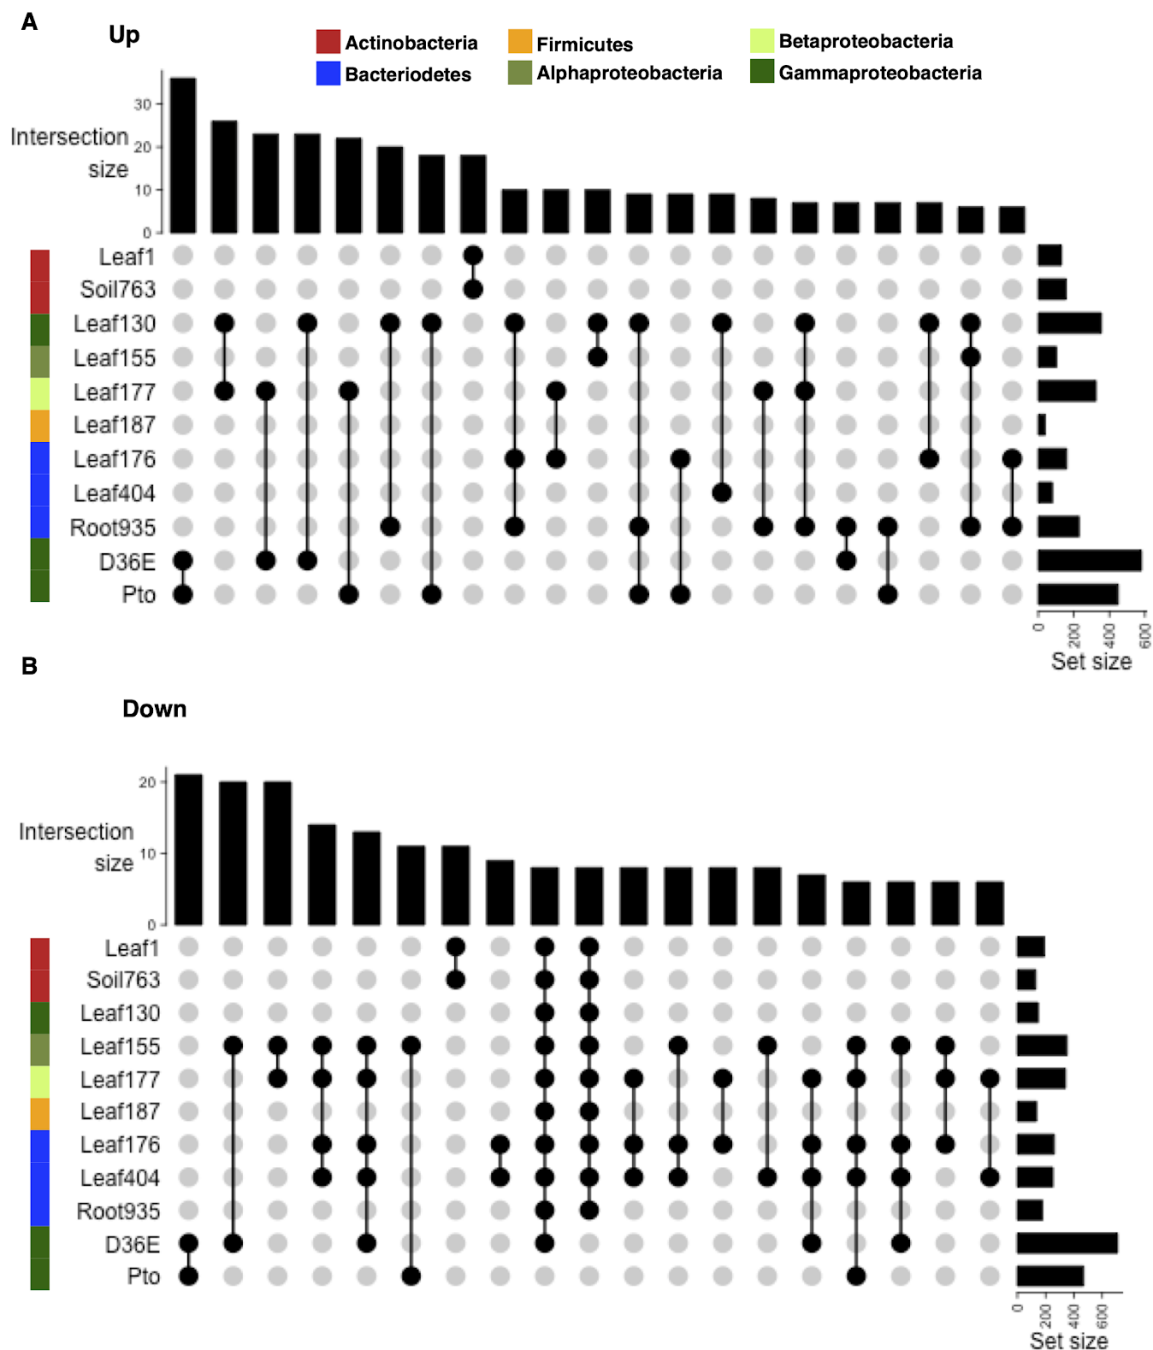

970 **Fig. S5: Bacterial genes differentially regulated in plants** UpSet intersection  
 971 plots of differentially expressed genes (DEGs;  $|\log_2FC| > 1$ ; FDR < 0.01;  
 972 two-tailed Student's t test followed by Storey's q-value) either (A) up- or (B)  
 973 downregulated *in planta*. Intersection size and set size indicate the number of  
 974 shared DEGs and the number of DEGs in each strain, respectively.  
 975 Combinations of more than one strain with intersection size > 5 are shown. The  
 976 color sidebars indicate the taxonomic affiliation.



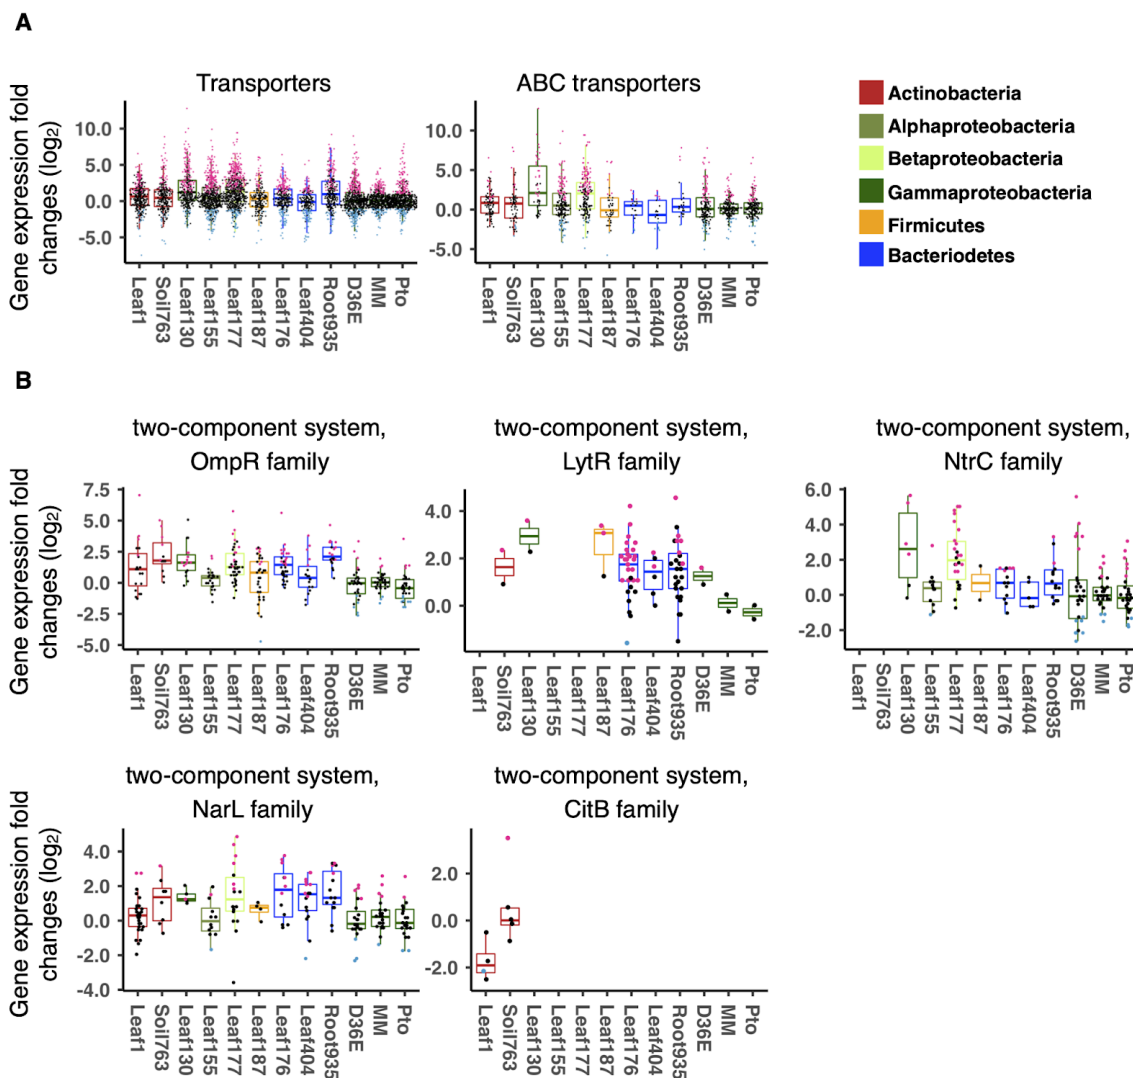

977

978 **Fig. S6: Expression of various processes of commensals *in planta* (A and**  
 979 **B) Expression fold changes (*in planta* vs. *in vitro*) of genes related to (A)**  
 980 **transporters and (B) two-component system. Results are shown as box plots with**  
 981 **boxes displaying the 25th–75th percentiles, the centerline indicating the median,**  
 982 **whiskers extending to the minimum, and maximum values no further than 1.5**  
 983 **inter-quartile range. Box color indicates the taxonomic affiliation (phylum/class**  
 984 **level) of each strain. All individual data points (genes) are overlaid with colors for**  
 985 **DEGs (red: upregulated, blue: downregulated, black: non-DEG).**

986

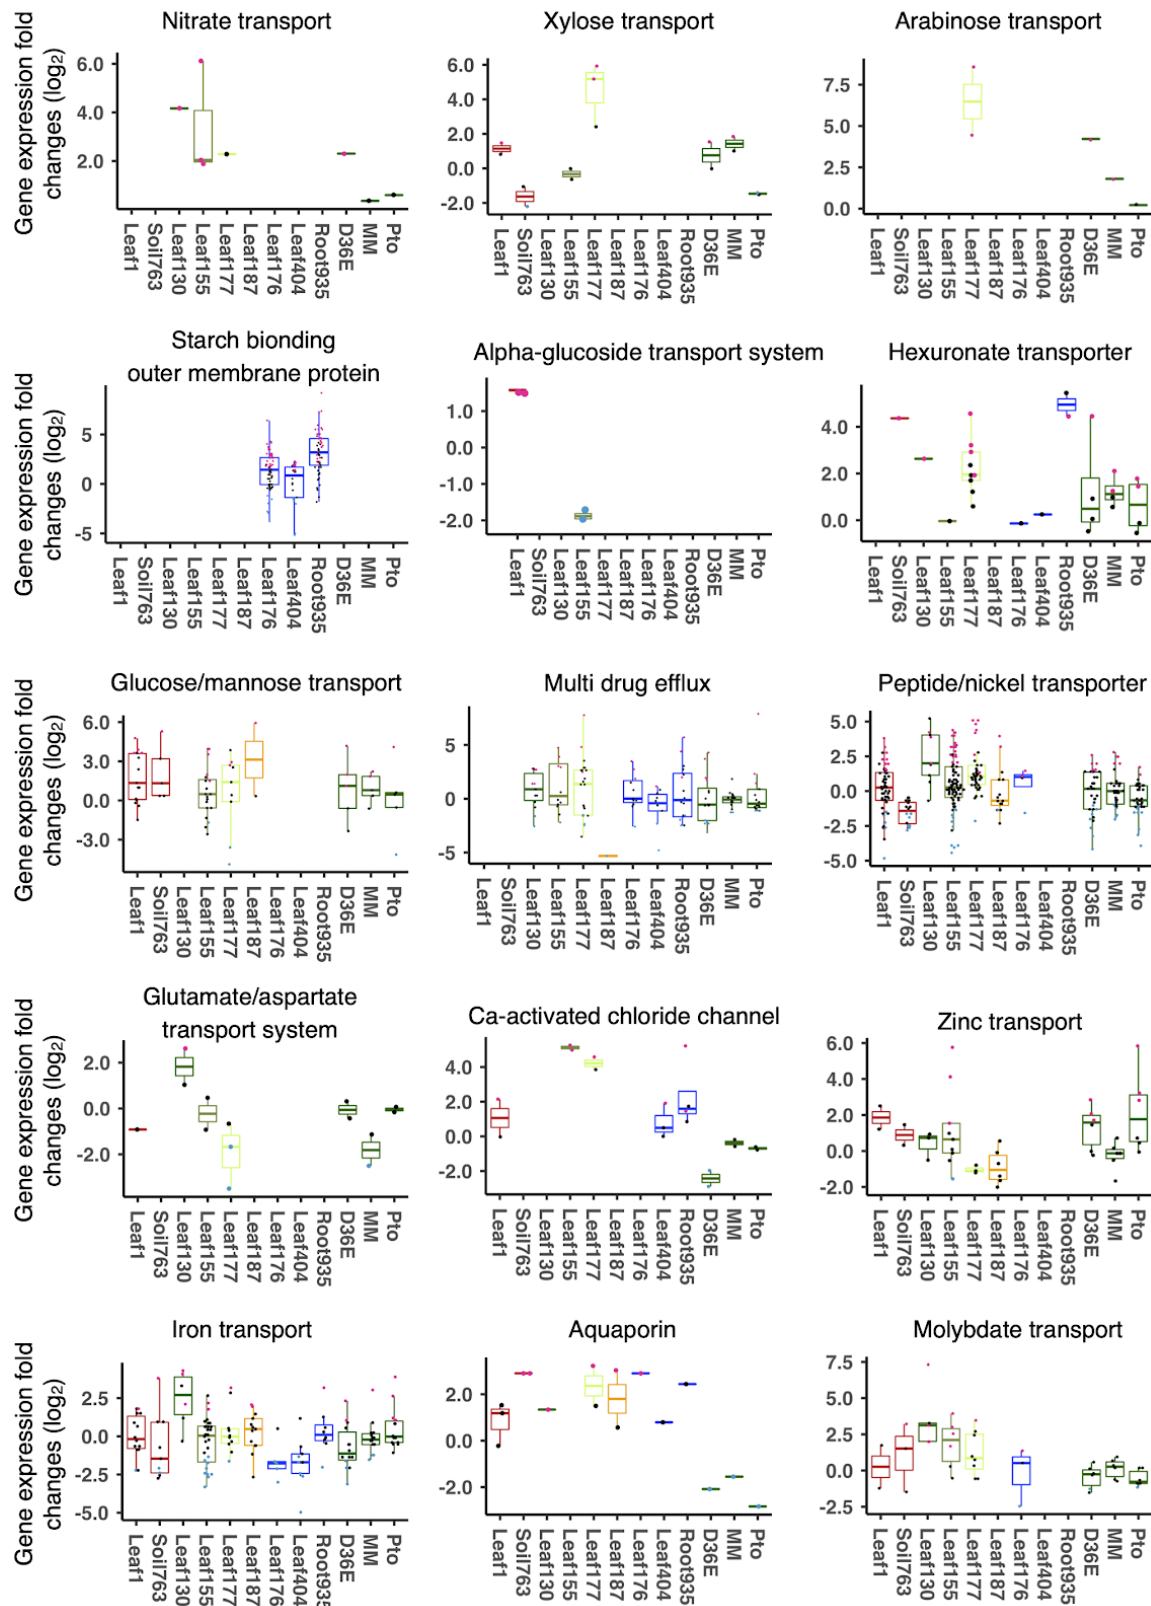

987 **Fig. S7: Expression of genes related to nutrient acquisition processes in**  
 988 **commensals** Expression fold changes (*in planta* vs. *in vitro*) of genes related to

989 nutrient transporters. Results are shown as box plots with boxes displaying the  
990 25th–75th percentiles, the centerline indicating the median, whiskers extending  
991 to the minimum, and maximum values no further than 1.5 inter-quartile range.  
992 Box color indicates the taxonomic affiliation (phylum/class level) of each strain  
993 (see Fig. S6 for the color code). All individual data points (genes) are overlaid  
994 with colors for DEGs (red: upregulated, blue: downregulated, black: non-DEG).

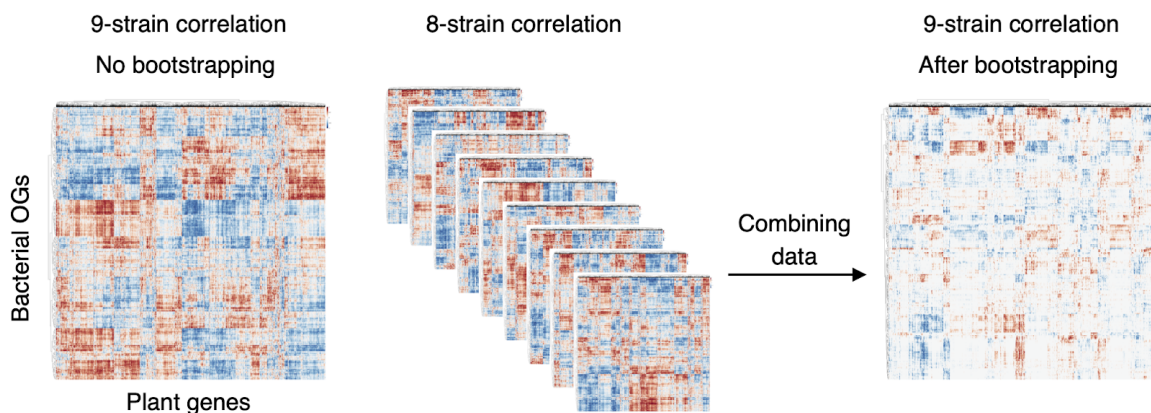

995 **Fig. S8: Integration of plant and bacterial transcriptomes** Schematic diagram  
996 showing a bootstrapping approach to evaluate correlations between individual  
997 plant and bacterial genes. To obtain robust correlation scores, Pearson's  
998 correlation coefficients were calculated using all the combinations of eight strains  
999 as well as using all the nine strains. Among these 8-strain and 9-strain datasets,  
1000 the weakest correlation coefficient value was used for each combination of a  
1001 bacterial OG and a plant gene ("Combining data").

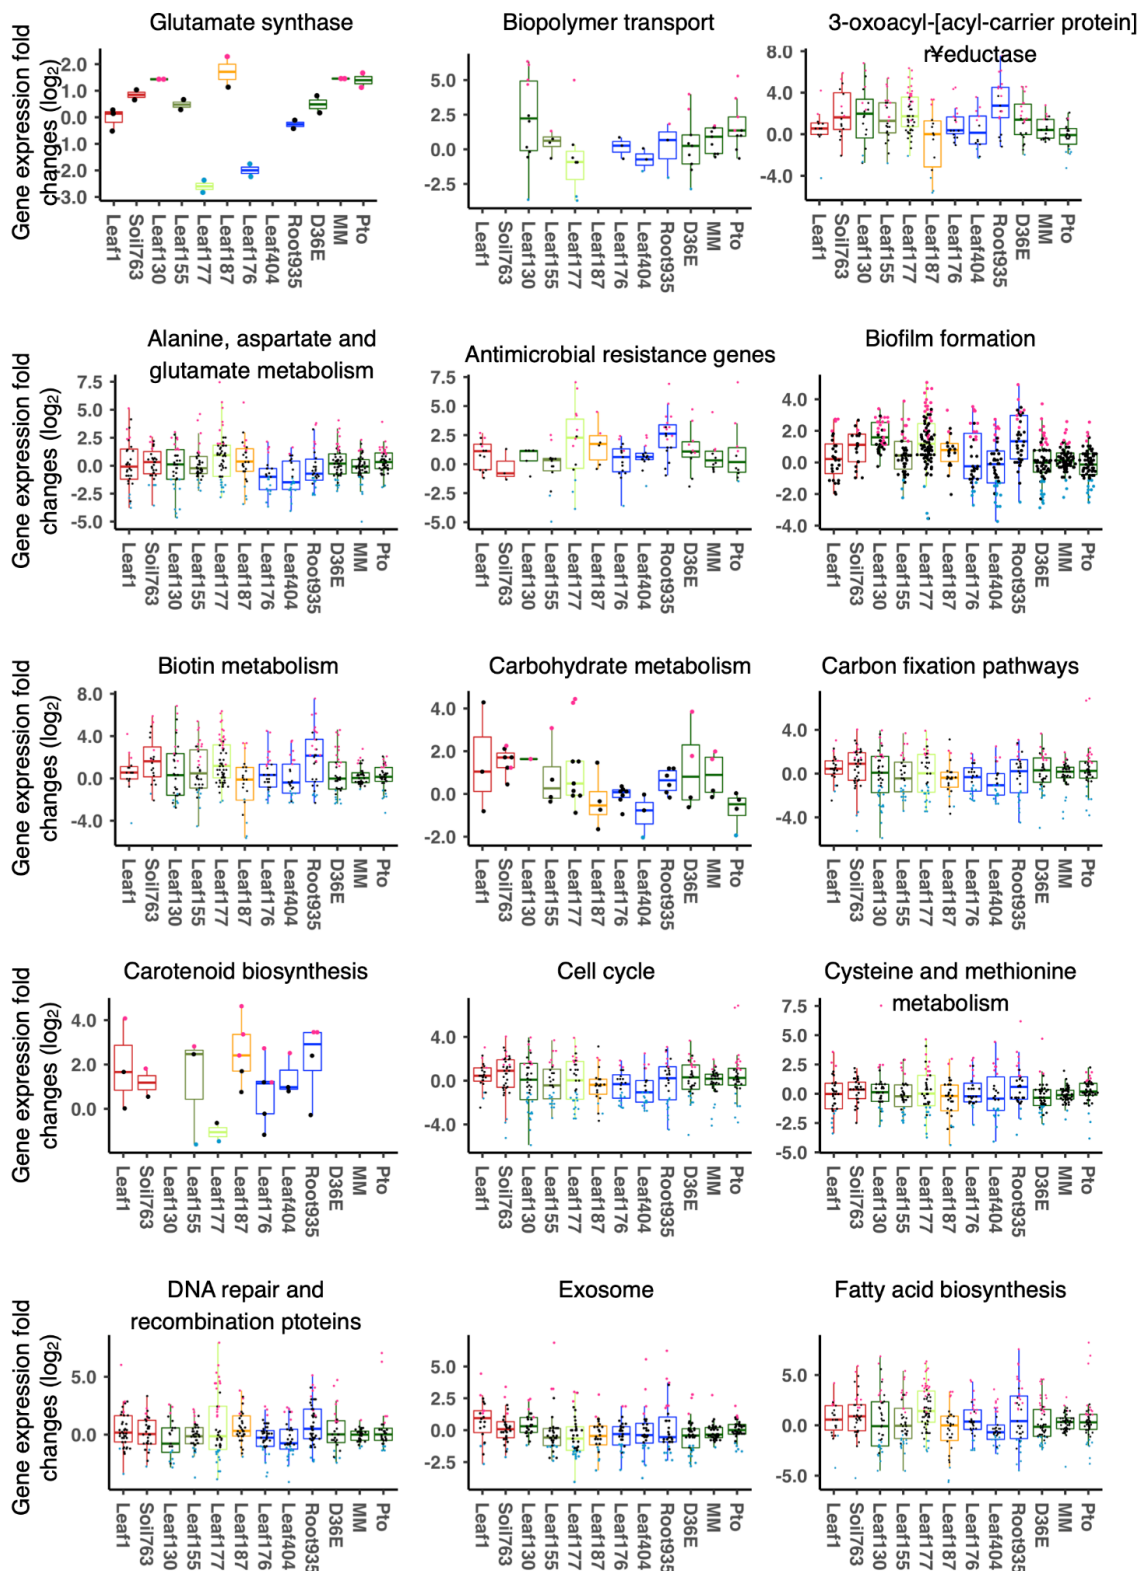

1002 **Fig. S9: Expression of commensals genes related to various physiological**  
1003 **processes *in planta*** Expression fold changes (*in planta* vs. *in vitro*) of genes  
1004 related to various functions. Results are shown as box plots with boxes  
1005 displaying the 25th–75th percentiles, the centerline indicating the median,  
1006 whiskers extending to the minimum, and maximum values no further than 1.5  
1007 inter-quartile range. Box color indicates the taxonomic affiliation (phylum/class  
1008 level) of each strain. All individual data points (genes) are overlaid with colors for  
1009 DEGs (red: upregulated, blue: downregulated, black: non-DEG).

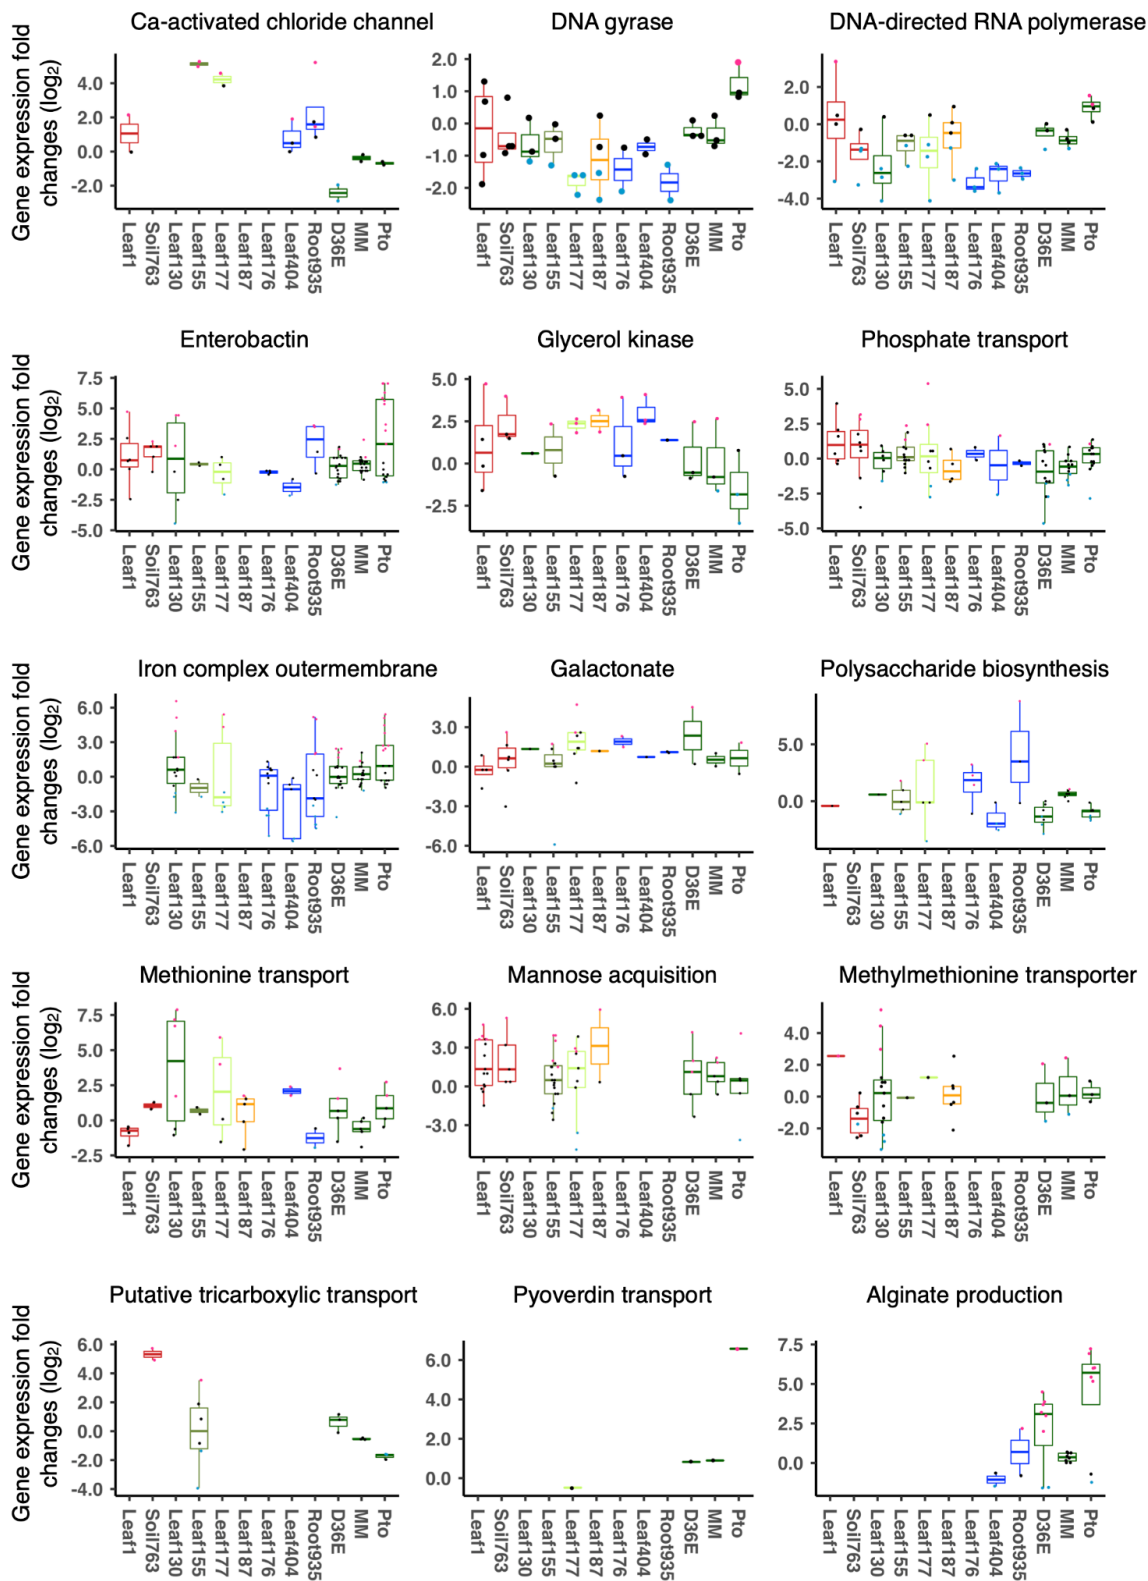

1010

1011 **Fig. S10: Expression of commensal genes related to various physiological**  
 1012 **processes *in planta*** Expression fold changes (*in planta* vs. *in vitro*) of genes  
 1013 related to various functions. Results are shown as box plots with boxes

1014 displaying the 25th–75th percentiles, the centerline indicating the median,  
1015 whiskers extending to the minimum, and maximum values no further than 1.5  
1016 inter-quartile range. Box color indicates the taxonomic affiliation (phylum/class  
1017 level) of each strain. All individual data points (genes) are overlaid with colors for  
1018 DEGs (red: upregulated, blue: downregulated, black: non-DEG).



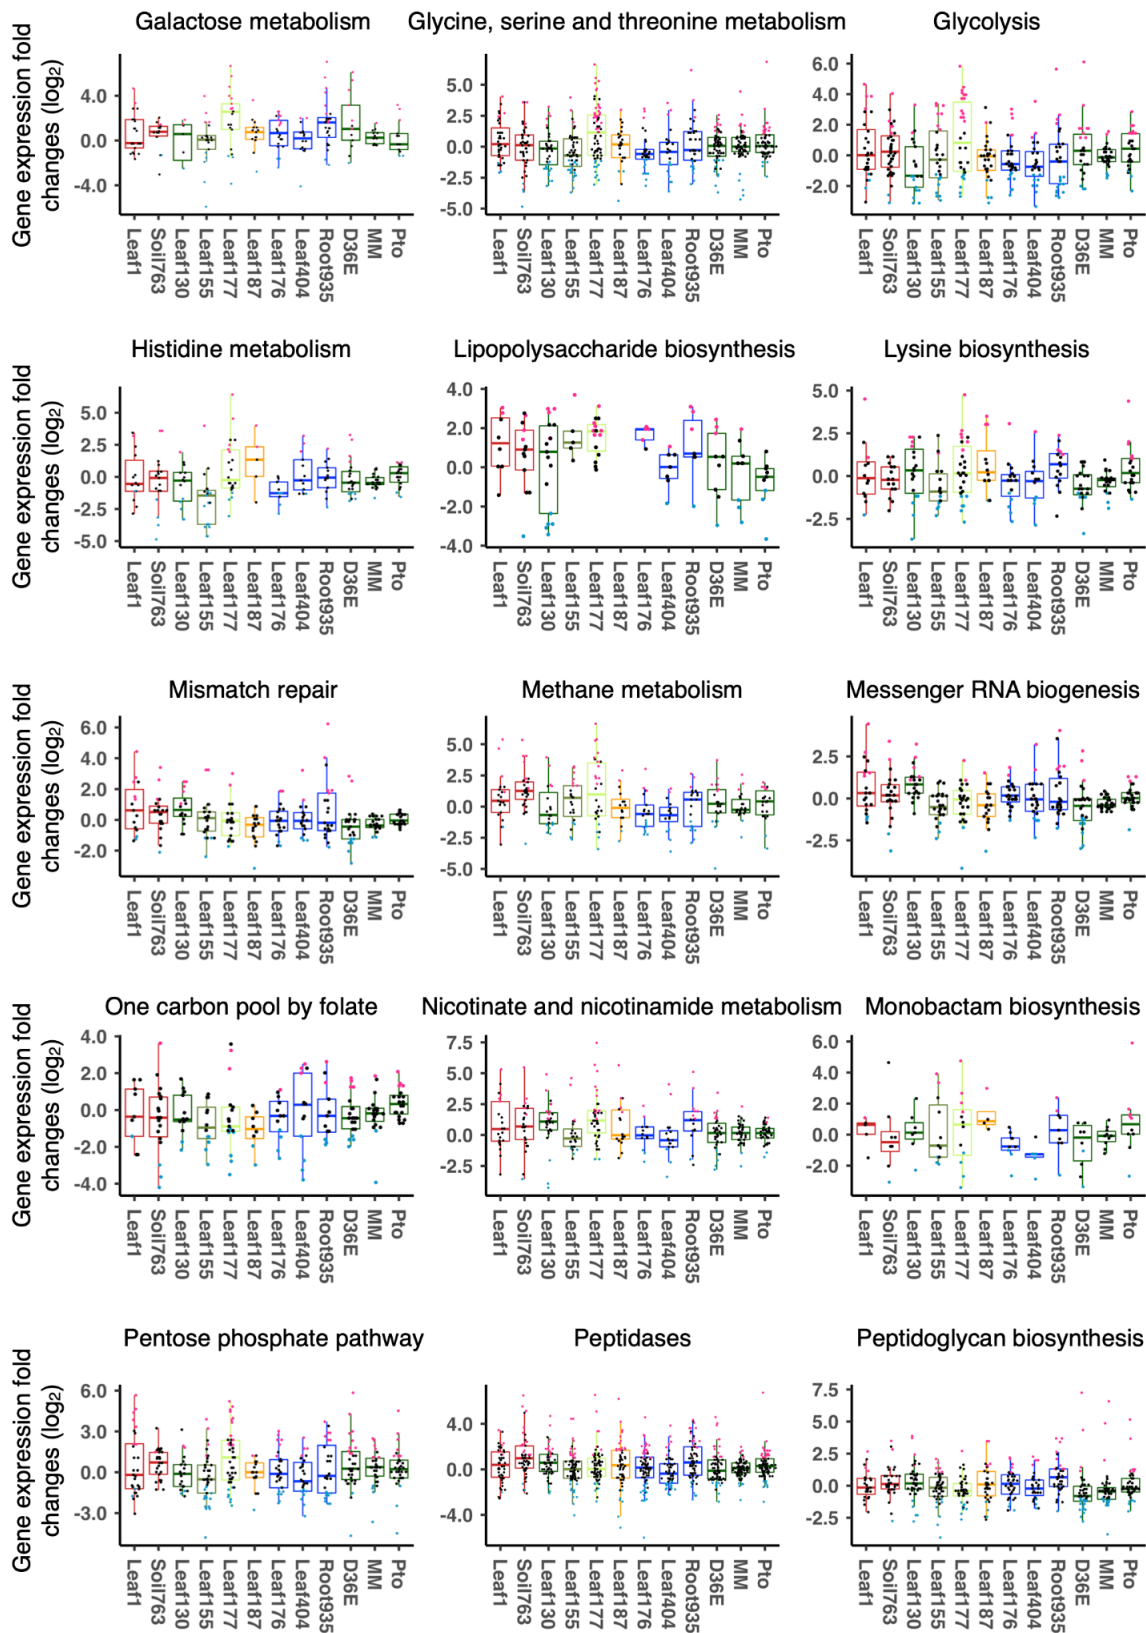

1019 **Fig. S11: Expression of commensal genes related to various physiological**  
1020 **processes *in planta*** Expression fold changes (*in planta* vs. *in vitro*) of genes  
1021 related to various functions. Results are shown as box plots with boxes  
1022 displaying the 25th–75th percentiles, the centerline indicating the median,  
1023 whiskers extending to the minimum, and maximum values no further than 1.5  
1024 inter-quartile range. Box color indicates the taxonomic affiliation (phylum/class  
1025 level) of each strain. All individual data points (genes) are overlaid with colors for  
1026 DEGs (red: upregulated, blue: downregulated, black: non-DEG).

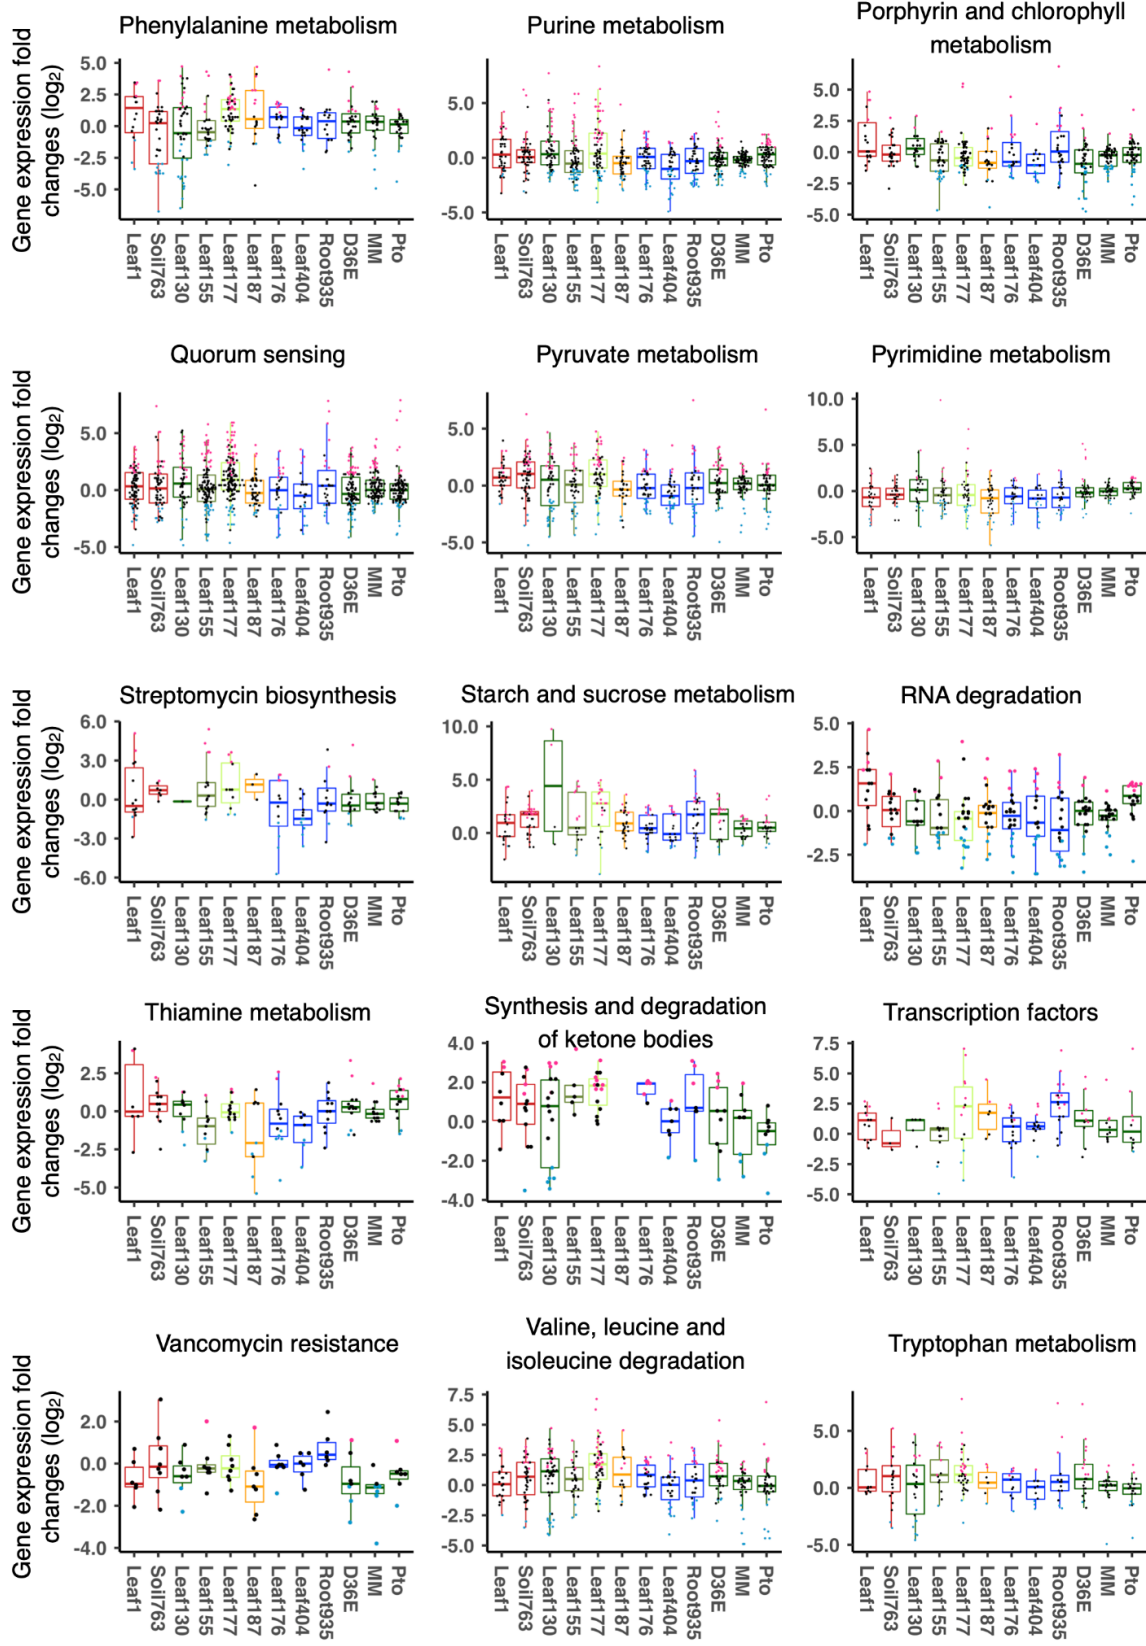

1027 **Fig. S12: Expression of commensal genes related to various physiological**  
1028 **processes *in planta*** Expression fold changes (*in planta* vs. *in vitro*) of genes  
1029 related to various functions. Results are shown as box plots with boxes  
1030 displaying the 25th–75th percentiles, the centerline indicating the median,  
1031 whiskers extending to the minimum, and maximum values no further than 1.5  
1032 inter-quartile range. Box color indicates the taxonomic affiliation (phylum/class  
1033 level) of each strain. All individual data points (genes) are overlaid with colors for  
1034 DEGs (red: upregulated, blue: downregulated, black: non-DEG).
